# Supplementary material for: Approval of artificial intelligence and machine learning-based medical devices in the USA and Europe (2015–20): a comparative analysis
Source: Elsevier journal article supplement (doi:10.1016/s2589-7500(20)30292-2), 2021-01-18
Supplement: mmc1 [file mmc1.pdf]

# THE LANCET

## Digital Health

### Supplementary appendix

This appendix formed part of the original submission and has been peer reviewed. We post it as supplied by the authors.

Supplement to: Muehlematter UJ, Daniore P, Vokinger KN. Approval of artificial intelligence and machine learning-based medical devices in the USA and Europe (2015–20): a comparative analysis. *Lancet Digit Health* 2021; published online Jan 18. [https://doi.org/10.1016/S2589-7500\(20\)30292-2](https://doi.org/10.1016/S2589-7500(20)30292-2).

*Consulted data sources*

| Name                                                                        | Region                  | Link                                                                                                                                                                                                                                                                                                                                                                                                                                      |
|-----------------------------------------------------------------------------|-------------------------|-------------------------------------------------------------------------------------------------------------------------------------------------------------------------------------------------------------------------------------------------------------------------------------------------------------------------------------------------------------------------------------------------------------------------------------------|
| De novo premarket review database                                           | US                      | <a href="https://www.fda.gov/medical-devices/device-advice-comprehensive-regulatory-assistance/medical-device-databases">https://www.fda.gov/medical-devices/device-advice-comprehensive-regulatory-assistance/medical-device-databases</a>                                                                                                                                                                                               |
| Premarket approval database                                                 | US                      | <a href="https://www.fda.gov/medical-devices/device-advice-comprehensive-regulatory-assistance/medical-device-databases">https://www.fda.gov/medical-devices/device-advice-comprehensive-regulatory-assistance/medical-device-databases</a>                                                                                                                                                                                               |
| FDA Product Code Classification                                             | US                      | <a href="https://www.fda.gov/medical-devices/classify-your-medical-device/download-product-code-classification-files">https://www.fda.gov/medical-devices/classify-your-medical-device/download-product-code-classification-files</a>                                                                                                                                                                                                     |
| openFDA Device 510(k) [/device/510(k)] database                             | US                      | <a href="https://open.fda.gov/downloads/">https://open.fda.gov/downloads/</a>                                                                                                                                                                                                                                                                                                                                                             |
| Medizinprodukte-Anzeigen (DIMDI)                                            | Europe (Germany)        | <a href="https://www.dimdi.de/dynamic/de/medizinprodukte/datenbankrecherche/">https://www.dimdi.de/dynamic/de/medizinprodukte/datenbankrecherche/</a>                                                                                                                                                                                                                                                                                     |
| Public Access Database for Medical Device Registration (MHRA)               | Europe (United Kingdom) | <a href="http://aic.mhra.gov.uk/era/pdr.nsf/name?openpage&amp;start=2001&amp;count=1000">http://aic.mhra.gov.uk/era/pdr.nsf/name?openpage&amp;start=2001&amp;count=1000</a>                                                                                                                                                                                                                                                               |
| Liste des communications de dispositifs des classes IIa, IIb, et III (ANSM) | Europe (France)         | <a href="https://www.ansm.sante.fr/Activites/Mise-sur-le-marche-des-dispositifs-medicaux-et-dispositifs-medicaux-de-diagnostic-in-vitro-DM-DMIA-DMDIV/DM-classes-IIa-IIb-III-et-DMIA-Communication-et-liste/(offset)/6">https://www.ansm.sante.fr/Activites/Mise-sur-le-marche-des-dispositifs-medicaux-et-dispositifs-medicaux-de-diagnostic-in-vitro-DM-DMIA-DMDIV/DM-classes-IIa-IIb-III-et-DMIA-Communication-et-liste/(offset)/6</a> |
| Elenco dei dispositivi medici (Ministero della Salute)                      | Europe (Italy)          | <a href="http://www.salute.gov.it/interrogazioneDispositivi">http://www.salute.gov.it/interrogazioneDispositivi</a>                                                                                                                                                                                                                                                                                                                       |
| Austrian Life Sciences Directory (LISAVienna)                               | Europe (Austria)        | <a href="http://www.lifesciencesdirectory.at/">http://www.lifesciencesdirectory.at/</a>                                                                                                                                                                                                                                                                                                                                                   |
| Medical Device Notifications (FAMHP)                                        | Europe (Belgium)        | <a href="https://www.vas.ehealth.fgov.be/registers/sadm/web/distribution/search">https://www.vas.ehealth.fgov.be/registers/sadm/web/distribution/search</a>                                                                                                                                                                                                                                                                               |

### *Factiva regex search*

We employed regex search strategy of Factiva (Dow Jones, New York, USA) for the languages English, German, French, Italian for all publications between 31 August 2014 to 31 August 2020 to identify potential AI/ML-based medical devices for inclusion.

For the US:

((food and drug administration or FDA or US or U.S.) and (approv\* or clear\* or revie\* or launch\*) and ((approv\* or clear\* or revie\* or launch\*) same ((algorithm or medical w/3 device\* or medical w/3 product\* or medical w/3 software\*) and (artificial intelligence or AI or machine learning or deep learning or neural network\*))))

For Europe:

((CE mark\* or CE appro\* or conformité européenne or marc\* CE or etichetta CE or marq\* CE or symbole CE or Europe\* w/3 launch or EU w/3 launch or E.U. w/3 launch or clear\* or zugelass\* or zulass\* or autoriz\* w/5 CE or approv\* or approuv\* or autoris\* or konformität\* or conformit\* or zertif\* or certificat\*) and ((CE mark\* or CE appro\* or conformité européenne or marc\* CE or etichetta CE or marq\* CE or symbole CE or Europe\* w/3 launch or EU w/3 launch or E.U. w/3 launch or clear\* or zugelass\* or zulass\* or autoriz\* w/5 CE or approv\* or approuv\* or autoris\* or konformität\* or conformit\* or zertif\* or certificat\*) same ((algorithm or medical w/3 device\* or medical w/3 product\* or medical w/3 software\* or algorithmus or algoritmo or algorithme or medizin w/3 produkt\* or dispositivo medico or prodotto medico or dispositif médical or produit médical or medizin w/3 software or medizinprodukt\* or medizinsoftware\* or software w/3 medico or logiciel médic) and (artificial intelligence or AI or machine learning or intelligen\* or deep learning or neural network or künstliche intelligenz or KI or intelligenz\* artificial\* or intelligence artificielle or IA or apprendimento automatico or apprentissage automatique or maschin\* lernen or apprendimento delle macchine or apprentissage machine))))

*Characteristics of FDA approved devices*

| <i>Device</i>                                 | <i>Manufacturer</i>                      | <i>Approval Pathway</i> | <i>Approval Date</i> | <i>Summary*</i>                                                                                                 | <i>Medical Specialty</i> | <i>Origin Country</i> | <i>Company Size</i> |
|-----------------------------------------------|------------------------------------------|-------------------------|----------------------|-----------------------------------------------------------------------------------------------------------------|--------------------------|-----------------------|---------------------|
| Cognition EEG/EP System                       | Neuronetrix Solutions                    | 510(k)                  | February 2015        | Acquisition, display analysis, storage, reporting and management of EEG and AEP                                 | Neurology                | United States         | Small               |
| IRIS Intelligent Retinal Imaging Systems LLC. | Intelligent Retinal Imaging Systems LLC. | 510(k)                  | February 2015        | Storing, managing, and displaying patient data, diagnostic data and images from computerized diagnostic systems | Radiology                | United States         | Small               |
| EndoTool SubQ                                 | Monarch Medical Technologies LLC.        | 510(k)                  | April 2015           | Calculation and recommendation of insulin dose                                                                  | Anesthesiology           | United States         | Small               |
| SnoreSounds                                   | Appian Medical Inc.                      | 510(k)                  | May 2015             | Diagnostic aid for snoring evaluation in patients                                                               | Anesthesiology           | United States         | Small               |
| Ahead 200                                     | BrainScope Company Inc.                  | 510(k)                  | May 2015             | Aid in analysis of brain electrical activity                                                                    | Neurology                | United States         | Small               |
| Cognivue                                      | Cerebral Assessment Systems Inc.         | de novo                 | June 2015            | Neurological assessment tool for dementia detection                                                             | Neurology                | United States         | Small               |
| Personalized Physiology Analytics Engine      | VGBio Inc.                               | 510(k)                  | June 2015            | Detection of change in the patient's vital signs                                                                | Cardiovascular           | United States         | Small               |
| AIX1000                                       | Gold Standard Diagnostics Inc.           | 510(k)                  | November 2015        | Aid in the diagnosis of syphilis                                                                                | Microbiology             | United States         | Small               |
| Dario Blood Glucose Monitoring System         | LabStyle Innovations Ltd.                | 510(k)                  | December 2015        | Quantitative measurement of glucose in blood samples                                                            | Clinical Chemistry       | United States         | Small               |
| QbCheck                                       | QBTECH AB                                | 510(k)                  | March 2016           | Aid in the clinical assessment of ADHD and in the evaluation of treatment interventions in patients with ADHD   | Neurology                | Sweden                | Small               |
| Cydar EV                                      | Cydar Ltd.                               | 510(k)                  | July 2016            | Image guidance by overlaying preoperative 3D vessel anatomy from a previously acquired CT scan                  | Radiology                | England               | Small               |
| Steth IO                                      | Stratoscientific Inc.                    | 510(k)                  | July 2016            | Detection and amplification of sounds from the heart and lungs                                                  | Cardiovascular           | United States         | Small               |
| Lvivo Toolbox                                 | DiA Imaging Analysis Ltd.                | 510(k)                  | July 2016            | Decision support tool for endocardial tracking resulting from ultrasound images                                 | Radiology                | Israel                | Small               |

|                                     |                                                                      |         |                |                                                                                                                                              |                    |               |       |
|-------------------------------------|----------------------------------------------------------------------|---------|----------------|----------------------------------------------------------------------------------------------------------------------------------------------|--------------------|---------------|-------|
| Icobrain                            | Icometrix NV                                                         | 510(k)  | August 2016    | Automatic labeling, visualization and volumetric quantification of segmentable brain structures from a set of MR images                      | Radiology          | Belgium       | Small |
| ClearRead CT                        | Riverrain Technologies Inc.                                          | 510(k)  | September 2016 | Assistance in review of multi-slice computed tomography exams of the chest and detection of potential nodules that radiologist should review | Radiology          | United States | Small |
| PixelShine                          | AlgoMedica Inc.                                                      | 510(k)  | September 2016 | Networking, communication, processing and enhancement of CT images in DICOM format                                                           | Radiology          | United States | Small |
| Ahead 300                           | BrainScope Company Inc.                                              | 510(k)  | September 2016 | Traumatic brain injury assessment tool                                                                                                       | Neurology          | United States | Small |
| Guardian Connect System             | Medtronic Minimed Inc. (parent company: Medtronic plc.)              | PMA     | September 2016 | Continuous glucose monitoring                                                                                                                | Clinical Chemistry | United States | Large |
| Tyto Stethoscope                    | Tyto Care Ltd.                                                       | 510(k)  | October 2016   | Electronic stethoscope that enables transmission of auscultation sound data                                                                  | Cardiovascular     | United States | Small |
| One Drop                            | AgaMatrix Inc.                                                       | 510(k)  | November 2016  | Quantitative measurement of blood glucose in blood samples                                                                                   | Clinical Chemistry | United States | Small |
| CT CoPilot                          | ZepMed LLC.                                                          | 510(k)  | December 2016  | Automatic labeling, visualization and volumetric quantification of brain images from CT scans                                                | Radiology          | United States | Small |
| CipherOx CRI Tablet                 | Flashback Technologies Inc.                                          | de novo | December 2016  | Noninvasive monitoring and analytics of acute blood loss                                                                                     | Cardiovascular     | United States | Small |
| Cantab Mobile                       | Cambridge Cognition Ltd.                                             | 510(k)  | January 2017   | Adjunctive tool to assess memory by testing visuospatial associative learning                                                                | Neurology          | England       | Small |
| Arterys Cardio DL                   | Arterys Inc.                                                         | 510(k)  | January 2017   | Analysis of cardiovascular images acquired from MR scanners                                                                                  | Radiology          | United States | Small |
| Philips IntelliVue GuardianSoftware | Philips Medizin Systeme Boeblingen GmbH (parent company: Philips NV) | 510(k)  | January 2017   | Collection, storage and management of data from Philips specified measurements and Philips Patient Monitors connected through networks       | Cardiovascular     | Germany       | Large |
| SIS Software                        | Surgical Information Sciences Inc.                                   | 510(k)  | February 2017  | Viewing, presentation and documentation of medical imaging                                                                                   | Radiology          | United States | Small |
| TruRhythm Detection                 | Medtronic Inc. (parent company: Medtronic plc.)                      | 510(k)  | February 2017  | Insertable automatically-activated and patient-activated monitoring system that records subcutaneous ECG                                     | Cardiovascular     | United States | Large |

|                                       |                                                                 |         |               |                                                                                                                            |                    |               |       |
|---------------------------------------|-----------------------------------------------------------------|---------|---------------|----------------------------------------------------------------------------------------------------------------------------|--------------------|---------------|-------|
| SeptiCyte LAB                         | Immunexpress Inc.                                               | 510(k)  | February 2017 | Aid to differentiate sepsis from infection-negative systemic inflammation                                                  | Microbiology       | United States | Small |
| PowerLook Tomo Detection (SecondLook) | iCAD Inc.                                                       | PMA     | March 2017    | Detection of soft tissue densities and calcifications in the 3D digital breast tomosynthesis slice                         | Radiology          | United States | Small |
| EnsoSleep                             | EnsoData Inc.                                                   | 510(k)  | March 2017    | Assessment of sleep quality and aid for diagnosis of sleep and respiratory related sleep disorders                         | Neurology          | United States | Small |
| MUTYH-Associated Polyposis (MAP)      | 23andMe Inc.                                                    | de novo | April 2017    | Genetic testing for cancer predisposition assessment                                                                       | Molecular Genetics | United States | Small |
| Triton System                         | Gauss Surgical Inc.                                             | 510(k)  | April 2017    | Image processing device for estimation of external blood loss                                                              | General Hospital   | United States | Small |
| AmCAD-UV                              | AmCad BioMed Corporation                                        | 510(k)  | April 2017    | Medical image processing tool for vascular pulsatility analysis                                                            | Radiology          | Taiwan        | Small |
| MATRx plus                            | Zephyr Sleep Technologies Inc.                                  | 510(k)  | May 2017      | Aid in the diagnosis and assessment of sleep disordered breathing                                                          | Anesthesiology     | Canada        | Small |
| AmCAD-US                              | AmCad BioMed Corporation                                        | 510(k)  | May 2017      | Visualization and analysis of statistical distributions of backscattered signals echoed by tissue compositions in the body | Radiology          | Taiwan        | Small |
| SmartTarget                           | SmartTarget Ltd.                                                | 510(k)  | June 2017     | Image-guided interventional and diagnostic procedures involving the prostate gland                                         | Radiology          | England       | Small |
| syngo Application Software            | Siemens Medical Solutions USA Inc. (parent company: Siemens AG) | 510(k)  | June 2017     | Diagnostic image viewing and post processing, and for viewing and post processing during interventional procedures         | Radiology          | United States | Large |
| Cardiologs                            | Cardiologs Technologies SAS                                     | 510(k)  | June 2017     | Assessment of arrhythmias using ECG data                                                                                   | Cardiovascular     | France        | Small |
| Arterys Viewer                        | Arterys Inc.                                                    | 510(k)  | July 2017     | Digital imaging and communications in Medicine (DICOM) and non-DICOM information and data management system                | Radiology          | United States | Small |
| QuantX                                | Quantitative Insights Inc.                                      | de novo | July 2017     | Assistance of radiologists in assessment and characterization of breast abnormalities in digital images                    | Radiology          | United States | Small |
| Advanced RBC Application              | Cella Vision AB                                                 | 510(k)  | August 2017   | Automated blood cell and peripheral blood smear locating device                                                            | Hematology         | Sweden        | Small |

|                               |                              |        |                |                                                                                                                               |                |               |       |
|-------------------------------|------------------------------|--------|----------------|-------------------------------------------------------------------------------------------------------------------------------|----------------|---------------|-------|
| SOZO                          | ImpediMed Ltd.               | 510(k) | August 2017    | Aid to clinical assessment of unilateral lymphedema                                                                           | Cardiovascular | Australia     | Large |
| DeepView Wound Imaging System | SpectralMD Inc.              | 510(k) | August 2017    | Intended for studies of blood flow in the microcirculation                                                                    | Cardiovascular | United States | Small |
| Poseidon Ultrasound System    | Butterfly Network Inc.       | 510(k) | September 2017 | Diagnostic ultrasound imaging and measurement of anatomical structures and fluids                                             | Radiology      | United States | Small |
| NeuroQuant                    | CorTechs Labs Inc.           | 510(k) | September 2017 | Automatic labeling, visualization and volumetric quantification of segmentable brain structures and lesions from MR images    | Radiology      | United States | Small |
| BladderScan PRIME PLUS        | Verathon Inc.                | 510(k) | September 2017 | Ultrasound device intended to be used for measuring the urine volume in the bladder noninvasively                             | Radiology      | United States | Large |
| Peerbridge Cor System         | Peerbridge Health Inc.       | 510(k) | September 2017 | Capture and transmission of symptomatic events and continuous external ECG information for 24 hours and up to 7 days          | Cardiovascular | United States | Small |
| Quantra                       | Hologic Inc.                 | 510(k) | October 2017   | Segregation of breast density into categories                                                                                 | Radiology      | United States | Large |
| INFINITT PACS 7.0             | Infinitt Healthcare Co. Ltd. | 510(k) | October 2017   | Image analysis and operational workflow improvement tool                                                                      | Radiology      | South Korea   | Large |
| Stethee Pro                   | M3dicine Pty. Ltd.           | 510(k) | October 2017   | Electronic stethoscope for detection and amplification of sounds from heart, lungs, arteries, veins and other internal organs | Cardiovascular | Australia     | Small |
| Rooti Rx                      | Rooti Labs Ltd.              | 510(k) | November 2017  | Heart monitoring and recommendation tool from ECG data                                                                        | Cardiovascular | Taiwan        | Small |
| QVCAD                         | Qview Medical Inc.           | PMA    | December 2017  | Aid to detect mammography-occult lesions in regions not known to have suspicious findings                                     | Radiology      | United States | Small |
| Neuronaute                    | Bioserenity SAS              | 510(k) | December 2017  | Acquisition, record, storage, transmission and display of EEG                                                                 | Neurology      | France        | Small |
| Radiomics App                 | Microsoft Corp.              | 510(k) | December 2017  | Organ and tumor contouring assistance for radiation planning from MRI and CT scans                                            | Radiology      | United States | Large |
| cNeuro cMRI                   | Combinostics Oy              | 510(k) | January 2018   | Quantitative assessment of brain images for neurodegenerative diseases by evaluating MRI images                               | Radiology      | Finland       | Small |

|                                     |                                                                                    |         |               |                                                                                                                                                                                           |                     |               |       |
|-------------------------------------|------------------------------------------------------------------------------------|---------|---------------|-------------------------------------------------------------------------------------------------------------------------------------------------------------------------------------------|---------------------|---------------|-------|
| CEREC Ortho Software                | Dentsply Sirona Inc.                                                               | 510(k)  | January 2018  | Data acquisition and modeling analysis for orthodontic patients and conditions                                                                                                            | Dental              | United States | Large |
| Illumeo System                      | Philips Medical Systems Technologies Ltd. (parent company: Koninklijke Philips NV) | 510(k)  | January 2018  | Image management system to acquire, store, distribute, process and display images and associated data throughout clinical environment                                                     | Radiology           | United States | Large |
| Arterys Oncology DL                 | Arterys Inc.                                                                       | 510(k)  | January 2018  | Support of oncological workflow by helping user confirm absence or presence of lesions; application supports anatomical datasets, such as CT or MR                                        | Radiology           | United States | Small |
| Empatica Care                       | Empatica S.R.L.                                                                    | 510(k)  | January 2018  | Epileptic seizures detection through wearable technology                                                                                                                                  | Neurology           | Italy         | Small |
| Glooko Mobile Insulin Dosing System | Glooko Inc.                                                                        | 510(k)  | February 2018 | Patient insulin dosing decision support and remote monitoring                                                                                                                             | Anesthesiology      | United States | Small |
| UNiD Spine Analyzer                 | Medicrea International SA                                                          | 510(k)  | February 2018 | Viewing and measuring images and planning of orthopedic surgeries                                                                                                                         | Radiology           | France        | Small |
| ContaCT                             | Viz.ai Inc.                                                                        | de novo | February 2018 | Image analysis for findings suggestive of a pre-specified clinical condition                                                                                                              | Radiology           | United States | Small |
| NeuroEEG                            | Memory MD Inc.                                                                     | 510(k)  | February 2018 | Acquisition, record, transmission, and display of electrical brain activity                                                                                                               | Neurology           | United States | Small |
| DM-Density                          | Densitas Inc.                                                                      | 510(k)  | February 2018 | Breast density calculation to aid physicians in the assessment of breast tissue composition                                                                                               | Radiology           | United States | Small |
| iQMR                                | Medic Vision - Imaging Solutions Ltd.                                              | 510(k)  | March 2018    | Networking, communication, processing and enhancement of MRI images in DICOM format                                                                                                       | Radiology           | United States | Small |
| Quantib Brain                       | Quantib BV                                                                         | 510(k)  | March 2018    | Non-invasive medical imaging processing application intended for automatic labeling, visualization, and volumetric quantification of segmentable brain structures from a set of MR images | Radiology           | Netherlands   | Small |
| Tissue of Origin Test Kit-FFPE      | Cancer Genetics Inc.                                                               | 510(k)  | March 2018    | In vitro diagnostic intended to measure degree of similarity between RNA expression patterns in a patient's formalin-fixed, paraffin-embedded (FFPE) tumor and RNA expression patterns    | Clinical Toxicology | United States | Large |



|                                                              |                                                                                                            |         |            |                                                                                                                                                                                           |                |               |       |
|--------------------------------------------------------------|------------------------------------------------------------------------------------------------------------|---------|------------|-------------------------------------------------------------------------------------------------------------------------------------------------------------------------------------------|----------------|---------------|-------|
| Imbio CT Lung Density Analysis Software                      | Imbio LLC.                                                                                                 | 510(k)  | March 2018 | Tool to modify the contours of segmentation masks produced by Imbio algorithms or to manually create segmentation mask contours                                                           | Radiology      | United States | Small |
| Acumen Hypotension Prediction Index Ev1000 Clinical Platform | Edwards Lifesciences LLC.                                                                                  | de novo | March 2018 | Detection support for future hypotensive events                                                                                                                                           | Cardiovascular | United States | Small |
| WAVE Clinical Platform - Visensia Software                   | Excel Medical Electronics LLC.                                                                             | 510(k)  | April 2018 | Remote monitoring platform to route, store and display data, alarms, results and diagnostic information from medical devices, electronic medical records and clinical information systems | Cardiovascular | United States | Small |
| PowerLook Density Assessment (SecondLook)                    | iCAD Inc.                                                                                                  | 510(k)  | April 2018 | Breast density evaluation to aid in the assessment of breast tissue composition                                                                                                           | Radiology      | United States | Small |
| MUSICA                                                       | Agfa HealthCare NV                                                                                         | 510(k)  | April 2018 | Performance of dynamic imaging examinations (fluoroscopy and/or rapid sequence)                                                                                                           | Radiology      | Belgium       | Large |
| IDx-DR                                                       | IDx LLC.                                                                                                   | de novo | April 2018 | Incorporates adaptive algorithm to evaluate ophthalmic images for diagnostic screening to identify retinal diseases or conditions                                                         | Ophthalmic     | United States | Large |
| RAPID Platform                                               | iSchemaView Inc.                                                                                           | 510(k)  | April 2018 | Viewing, processing and analysis of functional and dynamic imaging datasets acquired with CT Perfusion, CT Angiography and MRI including a Diffusion Weighted MRI                         | Radiology      | Sweden        | Small |
| syngo.MR Applications                                        | Siemens Medical Solutions USA Inc. (parent company: Siemens AG)                                            | 510(k)  | April 2018 | Post-acquisition image processing software for viewing, manipulating, evaluating, and analyzing MR, MR-PET, CT, PET, CT-Pet images and MR spectra                                         | Radiology      | United States | Large |
| Viz-CTP                                                      | Viz.ai Inc.                                                                                                | 510(k)  | April 2018 | Performance of image processing, analysis and communication of CT perfusion scans of the brain                                                                                            | Radiology      | United States | Small |
| NeuroCap                                                     | Memory MD Inc.                                                                                             | 510(k)  | April 2018 | EEG electrode array intended for use in ER, ICU and OR for recording of STAT EEGs                                                                                                         | Neurology      | United States | Small |
| Venue Ultrasound                                             | GE Medical Systems Ultrasound and Primary Care Diagnostics Inc. (parent company: General Electric Company) | 510(k)  | May 2018   | Ultrasound imaging, measurement and analysis of the human body and fluid for clinical applications                                                                                        | Radiology      | United States | Large |

|                                         |                                       |         |           |                                                                                                                                        |                              |               |       |
|-----------------------------------------|---------------------------------------|---------|-----------|----------------------------------------------------------------------------------------------------------------------------------------|------------------------------|---------------|-------|
| Sense System With IBT Electrodes        | Infinite Biomedical Technologies LLC. | 510(k)  | May 2018  | External prosthetic fittings of upper limbs                                                                                            | Neurology                    | United States | Small |
| VentriPoint Medical System Plus (VMS+)  | Ventripoint Diagnostics Ltd.          | 510(k)  | May 2018  | Intended to record, analyze, store and retrieve digital ultrasound images for computerized 3D image processing                         | Radiology                    | Canada        | Large |
| MindMotion GO                           | MindMaze SA                           | 510(k)  | May 2018  | Support of physical rehabilitation (including, for example, rehabilitation exercises for the upper extremity)                          | Neurology                    | Switzerland   | Small |
| Eclipse Treatment Planning System V15.6 | Varian Medical Systems Inc.           | 510(k)  | May 2018  | Radiotherapy treatment planning for patients with malignant or benign diseases                                                         | Radiology                    | United States | Large |
| OsteoDetect                             | Imagen Technologies Inc.              | de novo | May 2018  | Analysis of radiographs to identify and highlight distal radius fractures                                                              | Radiology                    | United States | Small |
| Senhance Surgical System                | TransEnterix Inc.                     | 510(k)  | May 2018  | Assistance in laparoscopic surgery                                                                                                     | Gastroenterology and Urology | United States | Small |
| LungQ                                   | Thirona Corp.                         | 510(k)  | June 2018 | Support in diagnosis and documentation of pulmonary tissues images (eg, abnormalities) from CT thoracic datasets                       | Radiology                    | Netherlands   | Small |
| DreaMed Advisor Pro                     | DreaMed Diabetes Ltd.                 | de novo | June 2018 | Insulin dosing decision support for diabetes management                                                                                | Clinical Chemistry           | Israel        | Small |
| HealthCCS                               | Zebra Medical Vision Ltd.             | 510(k)  | June 2018 | Non-invasive post-processing software used to evaluate calcified plaques in coronary arteries                                          | Radiology                    | Israel        | Small |
| EchoMD AutoEF Software                  | Bay Labs Inc.                         | 510(k)  | June 2018 | Provides automated estimation of left ventricular ejection fraction based on acquired transthoracic cardiac ultrasound images          | Radiology                    | United States | Small |
| NuVasive Pulse System                   | NuVasive Inc.                         | 510(k)  | June 2018 | Intraoperative neurophysiologic monitoring during spinal surgery, neck dissection, thoracic surgeries, and upper and lower extremities | Neurology                    | United States | Large |
| Uscan                                   | EchoNous Inc.                         | 510(k)  | July 2018 | Non-invasive imaging of human body with ultrasound                                                                                     | Radiology                    | United States | Small |
| Workflow Box                            | Mirada Medical Ltd.                   | 510(k)  | July 2018 | Route DICOM-compliant data to and from processing components                                                                           | Radiology                    | England       | Small |
| Dip.io                                  | Healthy.io Ltd.                       | 510(k)  | July 2018 | Semi-quantitative detection of analytes in urine                                                                                       | Clinical Chemistry           | Israel        | Small |

|                                              |                                                                                                       |         |                |                                                                                                                                                 |                       |               |       |
|----------------------------------------------|-------------------------------------------------------------------------------------------------------|---------|----------------|-------------------------------------------------------------------------------------------------------------------------------------------------|-----------------------|---------------|-------|
| Quantitative Total Extensible Imaging (QTXI) | AIQ Solutions Inc.                                                                                    | 510(k)  | July 2018      | Aid in evaluation and information management of digital medical images                                                                          | Radiology             | United States | Small |
| Natural Cycles                               | Natural Cycles Nordic AB                                                                              | de novo | August 2018    | Fertility monitoring: pregnancy prevention (contraception) or pregnancy planning (conception)                                                   | Obstetrics/Gynecology | Sweden        | Small |
| AmCAD-UT                                     | AmCad BioMed Corp.                                                                                    | 510(k)  | August 2018    | Assistance in analysis of thyroid ultrasound images                                                                                             | Radiology             | Taiwan        | Large |
| ECG App                                      | Apple Inc.                                                                                            | de novo | September 2018 | To create, record, store, transfer, and display ECG; determines presence of atrial fibrillation or sinus rhythm on classifiable waveform        | Cardiovascular        | United States | Large |
| Irregular Rhythm Notification Feature        | Apple Inc.                                                                                            | de novo | September 2018 | Analysis of pulse rate data to identify episodes of irregular heart rhythms suggestive of atrial fibrillation                                   | Cardiovascular        | United States | Large |
| VolparaDensity                               | Volpara Health Technologies Ltd.                                                                      | 510(k)  | September 2018 | Based on digital breast x-ray systems, calculation and quantification of a density map and from that determination of volumetric breast density | Radiology             | New Zealand   | Small |
| RightEye Vision System                       | RightEye LLC.                                                                                         | 510(k)  | September 2018 | Eye-movement recording, viewing, and analyzing in support for identification of visual tracking impairment                                      | Neurology             | United States | Small |
| FibriCheck                                   | Qompium NV                                                                                            | 510(k)  | September 2018 | Monitoring and recording of heart rhythms for patients diagnosed with or susceptible to developing atrial fibrillation                          | Cardiovascular        | Belgium       | Small |
| Ziostation2                                  | Ziosoft Inc.                                                                                          | 510(k)  | October 2018   | Image visualization enhancement for diagnostic support from different imaging tools                                                             | Radiology             | United States | Small |
| NvisionVLE Imaging System                    | NinePoint Medical Inc.                                                                                | 510(k)  | October 2018   | Imaging platform for evaluation of human tissue microstructure                                                                                  | Radiology             | United States | Small |
| Arterys MICA                                 | Arterys Inc.                                                                                          | 510(k)  | October 2018   | Diagnostic application that displays, processes, stores and transfers DICOM and non-DICOM medical data, with exception of mammography           | Radiology             | United States | Small |
| Automatic View Recognition                   | GE Medical Systems Ultrasound and Primary Care Diagnostics (parent company: General Electric Company) | 510(k)  | October 2018   | Automated workflow improvement tool for Vivid E95 / Vivid E90 general-purpose ultrasound systems, specialized for use in cardiac imaging        | Radiology             | United States | Large |

|                                                                                  |                                              |        |               |                                                                                                                                                                                                                                 |                |               |       |
|----------------------------------------------------------------------------------|----------------------------------------------|--------|---------------|---------------------------------------------------------------------------------------------------------------------------------------------------------------------------------------------------------------------------------|----------------|---------------|-------|
| Accipio Ix                                                                       | MaxQ-AI Ltd.                                 | 510(k) | October 2018  | Aid in prioritizing clinical assessment of adult non-contrast head CT cases with features suggestive of acute intracranial hemorrhage in acute care environment                                                                 | Radiology      | Israel        | Small |
| HemoScreen                                                                       | PixCell Medical Technologies Ltd.            | 510(k) | October 2018  | Point-of-care hematology analyzer for complete blood count analysis                                                                                                                                                             | Hematology     | Israel        | Small |
| NvisionVLE Imaging System, NvisionVLE Optical Probe, NvisionVLE Inflation System | NinePoint Medical Inc.                       | 510(k) | November 2018 | Imaging tool in the evaluation of human tissue microstructure, including esophageal tissue microstructure, by providing two-dimensional, cross-sectional, real-time depth visualization and may be used to mark areas of tissue | Radiology      | United States | Small |
| Athelas One                                                                      | Athelas Inc.                                 | 510(k) | November 2018 | Quantitative determination of white blood cells and neutrophil percentages in capillary or K2EDTA venous whole blood                                                                                                            | Hematology     | United States | Small |
| LensHooke X1 Pro Semen Quality Analyzer                                          | Bonraybio Co. Ltd.                           | 510(k) | November 2018 | Optical device for human semen analysis                                                                                                                                                                                         | Hematology     | Taiwan        | Small |
| AI-ECG Platform                                                                  | Shenzhen Carewell Electronics Ltd.           | 510(k) | November 2018 | Assistance in measuring and interpreting 12-lead resting ECG                                                                                                                                                                    | Cardiovascular | China         | Small |
| Transpara                                                                        | ScreenPoint Medical BV                       | 510(k) | November 2018 | Reading aid for physicians interpreting screening mammograms to identify regions suspicious for breast cancer and assess their likelihood of malignancy                                                                         | Radiology      | Netherlands   | Small |
| Persyst Spike Detection                                                          | Persyst Development Corp.                    | 510(k) | November 2018 | Review, monitoring and analysis of EEG recordings made by EEG devices                                                                                                                                                           | Neurology      | United States | Small |
| SubtlePET                                                                        | Subtle Medical Inc.                          | 510(k) | November 2018 | Image processing software for transfer, storage, and noise reduction of FDG and amyloid PET images                                                                                                                              | Radiology      | United States | Small |
| FerriSmart Analysis System                                                       | Resonance Health Analysis Services Pty. Ltd. | 510(k) | November 2018 | Measurement and monitoring of liver iron concentration and burden; aid in identification and monitoring of thalassemia                                                                                                          | Radiology      | Australia     | Small |
| AMRA Profiler                                                                    | AMRA Medical AB                              | 510(k) | December 2018 | Magnetic resonance diagnostic device software application for non-invasive fat and muscle evaluation                                                                                                                            | Radiology      | Sweden        | Small |

|                                             |                                                                    |         |               |                                                                                                                                                                                 |                |               |       |
|---------------------------------------------|--------------------------------------------------------------------|---------|---------------|---------------------------------------------------------------------------------------------------------------------------------------------------------------------------------|----------------|---------------|-------|
| Cardio-HART                                 | Cardio-Phoenix Inc.                                                | 510(k)  | December 2018 | Acquire and record the three different types of heart bio-signals (ECG, PCG, and MCG) and combine the results as an aid to diagnostic interpretation                            | Cardiovascular | United States | Small |
| Centricity Universal Viewer                 | GE Healthcare Inc. (parent company: General Electric Company)      | 510(k)  | December 2018 | Display of medical images and data from various imaging sources and from other healthcare information sources                                                                   | Radiology      | United States | Large |
| vascuCAP                                    | Elucid Bioimaging Inc.                                             | 510(k)  | December 2018 | Processing, review, analysis, communication and media interchange of images acquired from CT imaging devices                                                                    | Radiology      | United States | Small |
| Quantib ND                                  | Quantib BV                                                         | 510(k)  | December 2018 | Non-invasive medical imaging processing application intended for automatic labeling, visualization and volumetric quantification of segmentable brain structures from MR images | Radiology      | Netherlands   | Small |
| AmCAD-UO                                    | AmCad BioMed Corp.                                                 | 510(k)  | December 2018 | Analysis and quantification of upper airway from ultrasound system                                                                                                              | Radiology      | Taiwan        | Large |
| EyeBOX                                      | Oculogica Inc.                                                     | de novo | December 2018 | Traumatic brain injury eye movement assessment aid                                                                                                                              | Neurology      | United States | Small |
| MRCP+                                       | Perspectum Diagnostics Ltd.                                        | 510(k)  | January 2019  | Regions of variation of duct widths detection for diagnostic support from MRCP images                                                                                           | Radiology      | England       | Small |
| Study Watch                                 | Verily Life Sciences LLC. (parent company: Alphabet Inc.)          | 510(k)  | January 2019  | Record, store, transfer and display single-channel ECG rhythms                                                                                                                  | Cardiovascular | United States | Small |
| Artificial Intelligence Prescription (AIRx) | GE Medical Systems LLC. (parent company: General Electric Company) | 510(k)  | January 2019  | Whole body magnetic resonance scanner designed to support high resolution, high signal-to-noise ratio with automated workflow tool for SIGNA Premier MRI brain scans            | Radiology      | United States | Large |
| AI-Rad Companion Engine                     | Siemens Medical Solutions USA Inc. (parent company: Siemens AG)    | 510(k)  | February 2019 | Software platform that provides basic visualization and enables external post-processing extension for medical images used for diagnostic purposes                              | Radiology      | United States | Large |
| d-Nav Insulin Management System             | Hygieia Inc.                                                       | 510(k)  | February 2019 | Calculation next dose of insulin to aid in optimizing insulin management                                                                                                        | Anesthesiology | United States | Small |
| Coala Heart Monitor                         | Coala Life AB                                                      | 510(k)  | February 2019 | Record, store and transfer ECG rhythms and heart sound                                                                                                                          | Cardiovascular | Sweden        | Small |

|                                                                                 |                                                                            |         |               |                                                                                                                                                            |                |               |       |
|---------------------------------------------------------------------------------|----------------------------------------------------------------------------|---------|---------------|------------------------------------------------------------------------------------------------------------------------------------------------------------|----------------|---------------|-------|
| RX-1 Rhythm Express Remote Cardiac Monitoring System                            | VivaQuant Inc.                                                             | 510(k)  | February 2019 | Continuous recording of ECG data and analysis of arrhythmia                                                                                                | Cardiovascular | United States | Small |
| Early Bird Bleed Monitoring System                                              | Saranas Inc.                                                               | de novo | March 2019    | Bleed detection system for peri- and post-procedural monitoring of endovascular procedures                                                                 | Cardiovascular | United States | Small |
| RhythmAnalytics                                                                 | Biofourmis Singapore Pte. Ltd.                                             | 510(k)  | March 2019    | Assessment of cardiac arrhythmias                                                                                                                          | Cardiovascular | Singapore     | Small |
| cmTriage                                                                        | CureMetrix Inc.                                                            | 510(k)  | March 2019    | Notification tool to prioritize specific patients for screening mammograms                                                                                 | Radiology      | United States | Small |
| KardiaAI                                                                        | AliveCor Inc.                                                              | 510(k)  | March 2019    | Ambulatory ECG rhythm assessment                                                                                                                           | Cardiovascular | United States | Small |
| CardioFlux with Faraday Analytical Cloud                                        | Genetesis Inc.                                                             | 510(k)  | March 2019    | Non-invasive measurement and display of the magnetic signals produced by the electric currents of the heart.                                               | Cardiovascular | United States | Small |
| Unicel DxH 800 Cellular Analysis System With Early Sepsis Indicator Application | Beckman Coulter Inc.                                                       | 510(k)  | March 2019    | Diagnostic and prediction algorithm for early sepsis detection                                                                                             | Microbiology   | United States | Large |
| Loop System                                                                     | Spry Health Inc.                                                           | 510(k)  | March 2019    | Physiological change detection support through real-time data collection                                                                                   | Cardiovascular | United States | Small |
| Bone VCAR                                                                       | GE Medical Systems SCS (parent company: General Electric Company)          | 510(k)  | April 2019    | Post processing application for use in the analysis of CT spine images                                                                                     | Radiology      | France        | Large |
| Deep Learning Image Reconstruction                                              | GE Healthcare Japan Corporation (parent company: General Electric Company) | 510(k)  | April 2019    | Image reconstruction method intended to produce cross-sectional images of the head and body                                                                | Radiology      | Japan         | Large |
| Aidoc Pulmonary Embolism                                                        | Aidoc Medical Ltd.                                                         | 510(k)  | April 2019    | Radiological computer aided triage and notification software indicated for use in the analysis of head CTA images                                          | Radiology      | Israel        | Small |
| eMurmur ID                                                                      | CSD Labs GmbH                                                              | 510(k)  | April 2019    | Detection and identification of heart murmurs                                                                                                              | Cardiovascular | Austria       | Small |
| LungVision System                                                               | Body Vision Medical Ltd.                                                   | 510(k)  | April 2019    | Segmentation tool for 3D CT datasets to overall and register the datasets with live X-ray images of the same anatomy to support catheter/device navigation | Radiology      | United States | Small |

|                                             |                                                                |        |           |                                                                                                                                                                  |                |               |       |
|---------------------------------------------|----------------------------------------------------------------|--------|-----------|------------------------------------------------------------------------------------------------------------------------------------------------------------------|----------------|---------------|-------|
| HealthPNX                                   | Zebra Medical Vision Ltd.                                      | 510(k) | May 2019  | Pneumothorax detection support and alert for urgent findings from X-ray images                                                                                   | Radiology      | Israel        | Small |
| SurgicalAR                                  | MEDIVIS Inc.                                                   | 510(k) | May 2019  | Display of medical images and other healthcare data, including functions for image review, basic measurements and 3D visualization                               | Radiology      | United States | Small |
| APAS Independence instrument                | Clever Culture Systems AG                                      | 510(k) | May 2019  | Automates urine culture plate imaging and interpretation to detect presence or absence of microbial growth                                                       | Microbiology   | Switzerland   | Small |
| Complete Control System Gen2                | Coapt LLC.                                                     | 510(k) | May 2019  | External prosthetic fittings of the upper limbs                                                                                                                  | Neurology      | United States | Small |
| Aidoc C-Spine (Briefcase)                   | Aidoc Medical Ltd.                                             | 510(k) | May 2019  | Radiological computer aided triage and notification software indicated for use in the analysis of cervical spine CT images                                       | Radiology      | Israel        | Small |
| Advanced intelligent Clear-IQ Engine (AiCE) | Canon Medical Systems Corporation (parent company: Canon Inc.) | 510(k) | June 2019 | Noise reduction algorithm that improves image quality and reduces image noise for abdomen, pelvis, chest, cardiac, extremities and head applications             | Radiology      | Japan         | Large |
| HealthICH                                   | Zebra Medical Vision Ltd.                                      | 510(k) | June 2019 | Software workflow tool designed to aid clinical assessment of adult non-contrast head CT with features suggestive of intracranial hemorrhage                     | Radiology      | Israel        | Small |
| ClariCT.AI                                  | ClariPI Inc.                                                   | 510(k) | June 2019 | Networking, communication, processing and enhancement of CT images                                                                                               | Radiology      | South Korea   | Small |
| RayStation                                  | RaySearch Laboratories AB                                      | 510(k) | June 2019 | Treatment planning and analysis of radiation therapy                                                                                                             | Radiology      | Sweden        | Large |
| Intra-Operative Positioning System Platform | Centerline Biomedical Inc.                                     | 510(k) | June 2019 | Evaluation of vascular anatomy as captured via 3D modeling from previously acquired CT scan data                                                                 | Cardiovascular | United States | Small |
| CLARUS 700                                  | Carl Zeiss Meditec Inc.                                        | 510(k) | June 2019 | Capture, display, annotate and store images to aid in diagnosis and monitoring of diseases and disorders occurring in retina, ocular surfaces and visible adnexa | Ophthalmic     | United States | Large |
| LiverMultiScan                              | Perspectum Diagnostics Ltd.                                    | 510(k) | June 2019 | MR diagnostic device software application for non-invasive liver evaluation                                                                                      | Radiology      | England       | Small |

|                                            |                                                                    |        |             |                                                                                                                                                                                   |                       |               |       |
|--------------------------------------------|--------------------------------------------------------------------|--------|-------------|-----------------------------------------------------------------------------------------------------------------------------------------------------------------------------------|-----------------------|---------------|-------|
| Koios DS for Breast                        | Koios Medical Inc.                                                 | 510(k) | July 2019   | Assessment of breast ultrasound images of patients with soft tissue breast lesions                                                                                                | Radiology             | United States | Small |
| RayCare 2.3                                | RaySearch Laboratories AB                                          | 510(k) | July 2019   | Support of workflows, scheduling and clinical information management for oncology care and follow-up                                                                              | Radiology             | Sweden        | Large |
| DeepCT                                     | Deep01 Ltd.                                                        | 510(k) | July 2019   | Analysis of non-contrast CT images of the brain acquired in acute setting and notification of a specialist when intracranial hemorrhage suspected                                 | Radiology             | Taiwan        | Small |
| PhysIQ Heart Rhythm and Respiratory Module | physIQ Inc.                                                        | 510(k) | July 2019   | Calculation of heart rate and heart rate variability, detection of atrial fibrillation and determination of respiration rate using ambulatory ECG and triaxial accelerometer data | Cardiovascular        | United States | Small |
| Current Health Wearable Platform           | Current Health Ltd.                                                | 510(k) | July 2019   | Intended to provide visual and audible physiologic multi-parameter alarms                                                                                                         | Cardiovascular        | England       | Small |
| KIDScore D3                                | Vitrolife A/S                                                      | 510(k) | July 2019   | Decision support for prediction of likelihood of embryos developing to the blastocyst stage by scoring them according to their statistical viability                              | Obstetrics/Gynecology | Denmark       | Small |
| AI-Rad Companion Chest CT Software         | Siemens Medical Solutions USA Inc. (parent company: Siemens AG)    | 510(k) | July 2019   | Image processing software that provides analysis from CT images to support physicians in evaluation and assessment of cardiovascular diseases                                     | Radiology             | United States | Large |
| ACR Lab                                    | Healthy.io Ltd.                                                    | 510(k) | July 2019   | Semi-quantitative detection of albumin and creatinine in urine, as well as the presentation of their ratio; aid in the diagnosis for kidney function                              | Clinical Chemistry    | Israel        | Small |
| aBSI                                       | EXINI Diagnostics AB                                               | 510(k) | August 2019 | General picture archiving and communications system tools including applications for lesion marking and quantitative analysis of nuclear medicine imaging                         | Radiology             | Sweden        | Small |
| Critical Care Suite                        | GE Medical Systems LLC. (parent company: General Electric Company) | 510(k) | August 2019 | Triage and notification device that analyses frontal chest x-ray images for presence of pneumothorax                                                                              | Radiology             | United States | Large |
| HeartFlow FFRCT Analysis                   | HeartFlow Inc.                                                     | 510(k) | August 2019 | Analysis of CT images for clinically stable symptomatic patients with coronary artery disease                                                                                     | Cardiovascular        | United States | Small |



|                                              |                                                                 |        |                |                                                                                                                                                |                |               |       |
|----------------------------------------------|-----------------------------------------------------------------|--------|----------------|------------------------------------------------------------------------------------------------------------------------------------------------|----------------|---------------|-------|
| Biovitals Analytics Engine                   | Biofourmis Singapore Pte. Ltd.                                  | 510(k) | August 2019    | Ambulatory physiologic monitoring for therapeutic decision support                                                                             | Cardiovascular | Singapore     | Small |
| Clarius Ultrasound Scanner                   | Clarius Mobile Health Corporation                               | 510(k) | August 2019    | Diagnostic ultrasound imaging and fluid flow analysis                                                                                          | Radiology      | Canada        | Small |
| D2P software                                 | 3D Systems Inc.                                                 | 510(k) | August 2019    | Software interface and image segmentation of DICOM imaging data                                                                                | Radiology      | United States | Large |
| Myo Plus                                     | Otto Bock Healthcare Products GmbH                              | 510(k) | September 2019 | Exoprosthetic fittings of the upper limbs                                                                                                      | Neurology      | Austria       | Large |
| AI-Rad Companion Cardiovascular              | Siemens Medical Solutions USA Inc. (parent company: Siemens AG) | 510(k) | September 2019 | Image processing software for analysis from CT images to support physicians in evaluation and assessment of cardiovascular diseases            | Radiology      | United States | Large |
| BrainScope TBI                               | BrainScope Company Inc.                                         | 510(k) | September 2019 | Aid in the evaluation of patients who have sustained a closed head injury and have a GCS of 13-15                                              | Neurology      | United States | Small |
| SubtleMR                                     | Subtle Medical Inc.                                             | 510(k) | September 2019 | Image processing software for image enhancement in MRI images                                                                                  | Radiology      | United States | Small |
| syngo.via RT Image Suite                     | Siemens Medical Solutions USA Inc. (parent company: Siemens AG) | 510(k) | September 2019 | 3D and 4D image visualization, multimodality manipulation and contouring tool that helps preparation and response assessment of treatments     | Radiology      | United States | Large |
| StoneChecker                                 | Imaging Biometrics LLC.                                         | 510(k) | September 2019 | Application which assists trained professionals in evaluating DICOM computed tomography image studies of patients diagnosed with kidney stones | Radiology      | United States | Small |
| ProFound AI for Digital Breast Tomosynthesis | iCAD Inc.                                                       | 510(k) | October 2019   | Computer-assisted detection and diagnosis (CAD) software device intended to be used while reading digital breast tomosynthesis (DBT) exams     | Radiology      | United States | Small |
| Fluoroshield                                 | Omega Medical Imaging LLC.                                      | 510(k) | October 2019   | Modification device to provide an automated region of interest that reduces exposure to the patient and operator                               | Radiology      | United States | Small |
| Merge PACS                                   | Merge Healthcare Inc.                                           | 510(k) | October 2019   | Real-time picture archiving and communication system                                                                                           | Radiology      | United States | Large |
| RTHawk, HeartVista Cardiac Package           | HeartVista Inc.                                                 | 510(k) | October 2019   | Acquisition, reconstruction and display of cardiovascular MR images                                                                            | Radiology      | United States | Small |

|                                                       |                                                                            |        |               |                                                                                                                                                                                                 |                  |               |       |
|-------------------------------------------------------|----------------------------------------------------------------------------|--------|---------------|-------------------------------------------------------------------------------------------------------------------------------------------------------------------------------------------------|------------------|---------------|-------|
| AIXPLORER Mach 30<br>Ultrasound Diagnostic<br>Systems | Supersonic Imagine SA                                                      | 510(k) | October 2019  | Ultrasound diagnostic systems and transducers<br>intended for general purpose pulse echo ultrasound<br>imaging, soft tissue elasticity imaging, doppler<br>fluid flow analysis                  | Radiology        | France        | Small |
| EarlyVue VS30                                         | Philips Medizin Systeme<br>Boeblingen GmbH (parent<br>company: Philips NV) | 510(k) | October 2019  | Measure, display, alarm and record physiological<br>information                                                                                                                                 | Radiology        | Germany       | Large |
| Sight OLO                                             | Sight Diagnostics Ltd.                                                     | 510(k) | November 2019 | Quantitative multi-parameter automated<br>hematology analyzer intended for in vitro<br>diagnostic use in screening capillary or venous<br>whole blood samples                                   | Hematology       | Israel        | Small |
| MIMOSA Imager                                         | MIMOSA Diagnostics Inc.                                                    | 510(k) | November 2019 | Non-invasive estimation of spatial distribution of<br>percent oxygen saturation in a volume of tissue                                                                                           | Cardiovascular   | Canada        | Small |
| WellDoc BlueStar                                      | WellDoc Inc.                                                               | 510(k) | November 2019 | Digital care guidance for diabetes patients                                                                                                                                                     | General Hospital | United States | Small |
| 7D Surgical System                                    | 7D Surgical Inc.                                                           | 510(k) | November 2019 | Stereotaxic image guidance system intended for<br>spatial positioning and orientation of neurosurgical<br>instruments                                                                           | Neurology        | Canada        | Small |
| IB Lab Koala                                          | IB Lab GmbH                                                                | 510(k) | November 2019 | Radiological fully-automated image processing<br>software device of computed or directly digital<br>images intended to aid medical professionals in<br>measurement of minimum joint space width | Radiology        | Austria       | Small |
| Cleerly Labs                                          | Cleerly Inc.                                                               | 510(k) | November 2019 | Interactive tool for viewing and analyzing CT data<br>for determining presence and extent of coronary<br>plaques and stenosis                                                                   | Radiology        | United States | Small |
| MEDIP PRO                                             | MEDICALIP Co. Ltd.                                                         | 510(k) | November 2019 | Software interface and image segmentation system<br>for transfer of DICOM imaging information from<br>medical scanner to output file; pre-operative<br>software for treatment planning          | Radiology        | South Korea   | Small |
| EchoGo Core                                           | Ultromics Ltd.                                                             | 510(k) | November 2019 | Quantification and reporting of results of<br>cardiovascular function to support physician<br>diagnosis                                                                                         | Radiology        | England       | Small |
| RSI-MRI+                                              | MultiModal Imaging Services<br>Corp.                                       | 510(k) | November 2019 | Automatic post-acquisition image processing<br>software for analysis of diffusion-weighted and<br>anatomical magnetic resonance imaging data                                                    | Radiology        | United States | Small |

|                                           |                                                                               |        |               |                                                                                                                                            |                |               |       |
|-------------------------------------------|-------------------------------------------------------------------------------|--------|---------------|--------------------------------------------------------------------------------------------------------------------------------------------|----------------|---------------|-------|
| HealthCXR                                 | Zebra Medical Vision Ltd.                                                     | 510(k) | November 2019 | Software workflow tool to aid clinical assessment of adult chest X-ray with features suggestive of pleural effusion                        | Radiology      | Israel        | Small |
| PhantomMSK Trauma                         | OrthoGrid Systems Inc.                                                        | 510(k) | December 2019 | Image-processing software to assist in positioning of orthopedic trauma components                                                         | Radiology      | United States | Small |
| FFRangio System                           | CathWorks Ltd.                                                                | 510(k) | December 2019 | Analysis of previously acquired angiography DICOM data for patients with coronary artery disease                                           | Cardiovascular | Israel        | Small |
| NemoScan                                  | Software Nemotec S.L.                                                         | 510(k) | December 2019 | Diagnostic and treatment support for dental implantology                                                                                   | Radiology      | Spain         | Small |
| QyScore software                          | Qynapse SAS                                                                   | 510(k) | December 2019 | Automatic labeling, visualization and volumetric quantification of segmentable brain structures and lesions from MR images                 | Radiology      | France        | Small |
| Syngo CT CaScoring                        | Siemens Medical Solutions USA Inc. (parent company: Siemens AG)               | 510(k) | December 2019 | Evaluation and documentation of calcified coronary lesions using CT scanning data sets                                                     | Radiology      | United States | Large |
| Biosticker System                         | BioIntelliSense Inc.                                                          | 510(k) | December 2019 | Remote monitoring system for continuous collection of physiological data                                                                   | Cardiovascular | United States | Small |
| Smartho-D2 Electronic Stethoscope         | Hefei Mintti Medical Technology Co. Ltd.                                      | 510(k) | December 2019 | Detection and amplification of sounds from heart, lungs, and other internal organs with use of a selective frequency                       | Cardiovascular | China         | Small |
| Aidoc Intracranial Hemorrhage (Briefcase) | Aidoc Medical Ltd.                                                            | 510(k) | December 2019 | Workflow triage by flagging and communication of suspected findings of pathologies in head CT images, namely Intracranial Hemorrhage (ICH) | Radiology      | Israel        | Small |
| Aidoc Large Vessel Occlusion (Briefcase)  | Aidoc Medical Ltd.                                                            | 510(k) | December 2019 | Workflow triage by flagging and communication of suspected positive findings of Large Vessel Occlusion (LVO) pathologies                   | Radiology      | Israel        | Small |
| QLAB Advanced Quantification Software     | Philips Medical Systems Nederland BV (parent company: Koninklijke Philips NV) | 510(k) | December 2019 | Viewing and quantification of image data acquired on Philips ultrasound systems                                                            | Radiology      | United States | Large |
| Air Next                                  | NuvoAir AB                                                                    | 510(k) | January 2020  | Lung function and spirometry testing                                                                                                       | Anesthesiology | Sweden        | Small |

|                           |                                                                                |         |               |                                                                                                                                                        |                |               |       |
|---------------------------|--------------------------------------------------------------------------------|---------|---------------|--------------------------------------------------------------------------------------------------------------------------------------------------------|----------------|---------------|-------|
| EKO Analysis Software     | Eko Devices Inc.                                                               | 510(k)  | January 2020  | Support in the evaluation of patients' heart sounds and ECG's                                                                                          | Cardiovascular | United States | Small |
| Auto Positioning          | GE Hangwei Medical Systems Co. Ltd. (parent company: General Electric Company) | 510(k)  | January 2020  | Provide consistent patient positioning for optimal image quality and automatic exposure control                                                        | Radiology      | China         | Large |
| MRCAT Brain               | Philips Medical Systems MR Finland (parent company: Philips NV)                | 510(k)  | January 2020  | Radiation therapy planning through automated image segmentation for brain tumor patients                                                               | Radiology      | Finland       | Large |
| Caption Guidance          | Bay Labs Inc.                                                                  | de novo | February 2020 | Acquisition of cardiac ultrasound images                                                                                                               | Radiology      | United States | Small |
| Ethos Radiotherapy System | Varian Medical Systems Inc.                                                    | 510(k)  | February 2020 | Managing and monitoring radiation therapy treatment plans and sessions                                                                                 | Radiology      | United States | Large |
| ACTEON Imaging Suite      | de Gotzen S.r.L.                                                               | 510(k)  | February 2020 | Dental and maxillofacial diagnostic imaging                                                                                                            | Radiology      | Italy         | Small |
| Affinity Viewer           | Hermes Medical Solutions AB                                                    | 510(k)  | February 2020 | Process, display, analyze and manage nuclear medicine and other medical imaging data transferred from other workstations, PACS or acquisition stations | Radiology      | Sweden        | Small |
| densitasAI                | Densitas Inc.                                                                  | 510(k)  | February 2020 | Breast density assessment support from mammograms                                                                                                      | Radiology      | Canada        | Small |
| red dot algorithm         | Behold.AI Technologies Ltd.                                                    | 510(k)  | February 2020 | Aid clinical assessment of adult chest X-ray cases with features suggestive of pneumothorax                                                            | Radiology      | England       | Small |
| Icobrain-CTP              | Icometrix NV                                                                   | 510(k)  | February 2020 | Analysis and communication capabilities for dynamic imaging datasets that are acquired with CT Perfusion imaging protocols                             | Radiology      | Belgium       | Small |
| AccuContour               | Xiamen Manteia Technology Ltd.                                                 | 510(k)  | February 2020 | Registration of multimodality images and segment CT images, to generate needed information for treatment planning, evaluation and adaptation           | Radiology      | China         | Small |
| Broncholab                | Fluida Inc.                                                                    | 510(k)  | March 2020    | Support in diagnosis and documentation of pulmonary tissue images (eg, abnormalities) from CT thoracic datasets                                        | Radiology      | United States | Small |
| NightOwl                  | Ectosense NV                                                                   | 510(k)  | March 2020    | Evaluation of sleep-related breathing disorders suggestive of sleep apnea                                                                              | Anesthesiology | Belgium       | Small |

|                                  |                                                                      |        |            |                                                                                                                                                                                                                                    |                |               |       |
|----------------------------------|----------------------------------------------------------------------|--------|------------|------------------------------------------------------------------------------------------------------------------------------------------------------------------------------------------------------------------------------------|----------------|---------------|-------|
| Syngo.CT Lung CAD                | Siemens Medical Solutions Inc.<br>(parent company: Siemens AG)       | 510(k) | March 2020 | Assistance in detection of solid pulmonary nodules during review of multi-detector computed tomography examinations of the chest                                                                                                   | Radiology      | United States | Small |
| SonoVision Ultrasound System     | Tissue Differentiation Intelligence LLC.                             | 510(k) | March 2020 | Ultrasound system for visualization and evaluation of nerves, vascular and other anatomical structures                                                                                                                             | Radiology      | United States | Small |
| AI-Rad Companion Musculoskeletal | Siemens Medical Solutions USA Inc. (parent company: Siemens AG)      | 510(k) | March 2020 | Image processing software with the following functionality: segmentation of vertebrae, labelling of vertebrae, measurement of heights in each vertebra, measurement of mean Hounsfield value in volume of interest within vertebra | Radiology      | United States | Large |
| Viz ICH                          | Viz.AI Inc.                                                          | 510(k) | March 2020 | Analysis of CT images of the brain acquired in acute setting and notification to specialist when intracranial hemorrhage suspected                                                                                                 | Radiology      | United States | Small |
| AI-ECG Tracker                   | Shenzhen Carewell Electronics Co. Ltd.                               | 510(k) | March 2020 | Assessment of arrhythmias using ECG data acquired from adults without pacemakers                                                                                                                                                   | Cardiovascular | China         | Small |
| Hepatic VCAR                     | GE Medical Systems SCS<br>(parent company: General Electric Company) | 510(k) | March 2020 | Image analysis software that allows analysis and visualization of liver CT data                                                                                                                                                    | Radiology      | France        | Large |
| MammoScreen                      | Therapixel SA                                                        | 510(k) | March 2020 | Help to identify findings on screening FFDM acquired with compatible mammography systems and assess level of suspicion                                                                                                             | Radiology      | France        | Small |
| syngo.CT Cardiac Planning        | Siemens Medical Solutions USA Inc. (parent company: Siemens AG)      | 510(k) | March 2020 | Image analysis software package for evaluating contrast enhanced CT images; analysis of morphology and pathology of vascular and cardiac structures                                                                                | Radiology      | United States | Large |
| KOSMOS                           | EchoNous Inc.                                                        | 510(k) | March 2020 | Clinical assessment of cardiac and pulmonary systems and abdomen by acquiring ultrasound images, ECG rhythms and digital auscultation sounds and waveforms                                                                         | Cardiovascular | United States | Small |
| Rapid ICH                        | iSchemaView Inc.                                                     | 510(k) | March 2020 | Radiological computer aided triage and notification software for use in analysis of CT images                                                                                                                                      | Radiology      | United States | Small |

\* The summary was extracted and summarized from the FDA's documentation and is not comprehensive. Please consult the FDA's website or contact the manufacturers for further information.

### Characteristics of CE marked devices

| <i>Device</i>         | <i>Manufacturer</i>        | <i>CE Marking</i> | <i>Summary†</i>                                                                                                                              | <i>Medical Specialty</i> | <i>Origin Country</i> | <i>Company Size</i> |
|-----------------------|----------------------------|-------------------|----------------------------------------------------------------------------------------------------------------------------------------------|--------------------------|-----------------------|---------------------|
| ER APP, Breast Cancer | Visiopharm A/S             | February 2015     | Determination of estrogen receptor positivity and negativity in breast cancer                                                                | Pathology                | Denmark               | Small               |
| PR APP, Breast Cancer | Visiopharm A/S             | February 2015     | Determination of progesterone receptor positivity and negativity in breast cancer                                                            | Pathology                | Denmark               | Small               |
| Veolity LungCAD       | MeVis Medical Solutions AG | March 2015        | Workflow improvement and quality enhancement in lung CT                                                                                      | Radiology                | Germany               | Small               |
| EyeArt                | Eyenuk Inc.                | March 2015        | Diabetic retinopathy detection support                                                                                                       | Ophthalmic               | United States         | Small               |
| Icobrain MS           | Icometrix NV               | March 2015        | Quantification tools for abnormalities and changes in brain structures                                                                       | Neurology                | Belgium               | Small               |
| e-ASPECTS             | Brainomix Ltd.             | March 2015        | Decision support tool for assessing stroke signs from CT scans                                                                               | Radiology                | England               | Small               |
| DM-Density            | Densitas Inc.              | April 2015        | Breast density calculation to aid physicians in the assessment of breast tissue composition                                                  | Radiology                | Canada                | Small               |
| Kaiku Health          | Kaiku Oy                   | August 2015       | Outcome monitoring and symptom tracking for cancer patients                                                                                  | General Hospital         | Finland               | Small               |
| PatientSource         | PatientSource Ltd.         | September 2015*   | Diagnosis assistance and system integration for clinical setting                                                                             | General Hospital         | England               | Small               |
| Triton System         | Gauss Surgical Inc.        | November 2015     | Image processing device for estimation of external blood loss                                                                                | General Hospital         | United States         | Small               |
| ClearRead CT          | Riverain Technologies LLC. | November 2015     | Assistance in review of multi-slice computed tomography exams of the chest and detection of potential nodules that radiologist should review | Radiology                | United States         | Small               |
| Transpara             | ScreenPoint Medical BV     | December 2015     | Reading aid for physicians interpreting screening mammograms to identify regions suspicious for breast cancer                                | Radiology                | Netherlands           | Small               |
| AMRA Profiler         | AMRA Medical AB            | December 2015     | MR diagnostic device software application for non-invasive fat and muscle evaluation                                                         | Radiology                | Sweden                | Small               |

|                     |                                                           |              |                                                                                                                                                                                           |                    |             |       |
|---------------------|-----------------------------------------------------------|--------------|-------------------------------------------------------------------------------------------------------------------------------------------------------------------------------------------|--------------------|-------------|-------|
| Cydar EV            | CYDAR Ltd.                                                | January 2016 | Image guidance by overlaying preoperative 3D vessel anatomy from a previously acquired CT scan                                                                                            | Radiology          | England     | Small |
| Coala Heart Monitor | Coala Life AB                                             | January 2016 | Record, store and transfer ECG rhythms and heart sound                                                                                                                                    | Cardiovascular     | Sweden      | Small |
| Guardian connect    | Medtronic Minimed Inc.<br>(parent company: Medtronic plc) | March 2016   | Continuous glucose monitoring                                                                                                                                                             | Cardiovascular     | Ireland     | Large |
| Dip.io              | Healthy.io Ltd.                                           | March 2016   | Smartphone-based, at-home urinalysis test                                                                                                                                                 | Clinical Chemistry | Israel      | Small |
| AmCAD-US            | AmCad BioMed Corporation                                  | April 2016   | Visualization and analysis of statistical distributions of backscattered signals echoed by tissue compositions in the body                                                                | Radiology          | Taiwan      | Small |
| PREDicT Test        | PIvital Products Ltd.                                     | April 2016   | Prediction for success of depression treatment                                                                                                                                            | Neurology          | England     | Small |
| Neuronaute          | Bioserenity SAS                                           | May 2016     | Acquisition, record, storage, transmission and display of EEG                                                                                                                             | Neurology          | France      | Small |
| AmCAD-UV            | AmCad BioMed Corporation                                  | May 2016     | Medical image processing tool for vascular pulsatility analysis                                                                                                                           | Radiology          | Taiwan      | Small |
| Empatica Care       | Empatica S.r.L.                                           | May 2016     | Epileptic seizures detection through wearable technology                                                                                                                                  | Neurology          | Italy       | Small |
| SmartTarget         | SmartTarget Ltd.                                          | June 2016    | Image-guided interventional and diagnostic procedures involving the prostate gland                                                                                                        | Radiology          | England     | Small |
| Cardiologs          | Cardiologs Technologies SAS                               | June 2016    | Assessment of arrhythmias using ECG data                                                                                                                                                  | Cardiovascular     | France      | Small |
| Quantib Brain       | Quantib BV                                                | June 2016    | Non-invasive medical imaging processing application intended for automatic labeling, visualization, and volumetric quantification of segmentable brain structures from a set of MR images | Radiology          | Netherlands | Small |
| FibriCheck          | Qompium NV                                                | July 2016    | Monitoring and recording of heart rhythms for patients diagnosed with or susceptible to developing atrial fibrillation                                                                    | Cardiovascular     | Belgium     | Small |
| LungQ               | Thirona Corp.                                             | August 2016  | Support in diagnosis and documentation of pulmonary tissues images (eg, abnormalities) from CT thoracic datasets                                                                          | Radiology          | Netherlands | Small |

|                                                                |                                                                      |                |                                                                                                                                        |                  |               |       |
|----------------------------------------------------------------|----------------------------------------------------------------------|----------------|----------------------------------------------------------------------------------------------------------------------------------------|------------------|---------------|-------|
| CAD4TB                                                         | Delft Imaging BV                                                     | August 2016    | Tuberculosis-related abnormalities detection for diagnostic support from X-ray images                                                  | Radiology        | Netherlands   | Small |
| Philips IntelliVue GuardianSoftware                            | Philips Medizin Systeme Boeblingen GmbH (parent company: Philips NV) | August 2016    | Collection, storage and management of data from Philips specified measurements and Philips Patient Monitors connected through networks | Cardiovascular   | Germany       | Large |
| Eclipse Treatment Planning System V15.6                        | Varian Medical Systems Inc.                                          | September 2016 | Radiotherapy treatment planning for patients with malignant or benign diseases                                                         | Radiology        | United States | Large |
| cNeuro cMRI                                                    | Combinostics Oy                                                      | September 2016 | Quantitative assessment of brain images for neurodegenerative diseases by evaluating MRI images                                        | Radiology        | Finland       | Small |
| Kaia Health App                                                | Kaia Health Software Inc.                                            | November 2016  | Digital therapeutics to manage chronic diseases                                                                                        | General Hospital | Germany       | Small |
| Medios AI                                                      | Remidio Innovative Solutions Pvt. Ltd.                               | November 2016  | Offline diabetic retinopathy detection support                                                                                         | Ophthalmic       | India         | Small |
| Rooti Rx                                                       | Rooti Labs Ltd.                                                      | November 2016  | Heart monitoring and recommendation tool from ECG data                                                                                 | Cardiovascular   | Taiwan        | Small |
| Acumen Hypotension Prediction Index – Ev1000 Clinical Platform | Edwards Lifesciences LLC.                                            | November 2016  | Detection support for future hypotensive events                                                                                        | Cardiovascular   | United States | Small |
| CEREC Ortho Software                                           | Dentsply Sirona Inc.                                                 | November 2016  | Data acquisition and modeling analysis for orthodontic patients and conditions                                                         | Dental           | United States | Large |
| MindMotion GO                                                  | MindMaze SA                                                          | November 2016  | Support of physical rehabilitation (including, for example, rehabilitation exercises for the upper extremity)                          | Neurology        | Switzerland   | Small |
| Arterys Cardio DL                                              | Arterys Inc.                                                         | December 2016  | Analysis of cardiovascular images acquired from MR scanners                                                                            | Radiology        | United States | Small |
| One Drop Mobile                                                | AgaMatrix Inc.                                                       | December 2016  | Quantitative measurement of blood glucose in blood samples                                                                             | General Hospital | United States | Small |
| EarlySense continuous monitoring solution                      | EarlySense Ltd.                                                      | December 2016* | Contact-free patient monitoring                                                                                                        | General Hospital | Israel        | Small |
| RetCAD                                                         | Delft Imaging BV                                                     | January 2017   | Age-related macular degeneration or diabetic retinopathy detection support                                                             | Ophthalmic       | Netherlands   | Small |



|                                         |                                                      |               |                                                                                                                                                                   |                          |               |       |
|-----------------------------------------|------------------------------------------------------|---------------|-------------------------------------------------------------------------------------------------------------------------------------------------------------------|--------------------------|---------------|-------|
| Natural Cycles                          | Natural Cycles Nordic AB                             | January 2017  | Fertility monitoring: pregnancy prevention (contraception) or pregnancy planning (conception)                                                                     | Obstetrics/Gynecology    | Switzerland   | Small |
| myAsthma                                | my mhealth Ltd.                                      | January 2017  | Assessment of symptoms for asthma management                                                                                                                      | General Hospital         | England       | Small |
| Mediktor                                | Teckel Medical SL                                    | February 2017 | Symptom analysis and diagnostic support                                                                                                                           | General Hospital         | Spain         | Small |
| Clarius Ultrasound Scanner              | Clarius Mobile Health Corporation                    | February 2017 | Diagnostic ultrasound imaging and fluid flow analysis                                                                                                             | Radiology                | Canada        | Small |
| ColonFlag                               | Medial EarlySign Inc.                                | March 2017    | High risk colorectal cancer detection support for pre-symptomatic patients                                                                                        | Gastroenterology/Urology | Israel        | Small |
| Ziostation2                             | Ziosoft Inc.                                         | March 2017*   | Image visualization enhancement for diagnostic support                                                                                                            | Radiology                | United States | Small |
| syngo Application Software              | Siemens Healthcare GmbH (parent company: Siemens AG) | March 2017    | Diagnostic image viewing and post processing, and for viewing and post processing during interventional procedures                                                | Radiology                | Germany       | Large |
| Current Health Wearable Platform        | Current Health Ltd.                                  | April 2017    | Intended to provide visual and audible physiologic multi-parameter alarms                                                                                         | Cardiovascular           | England       | Small |
| Babylon                                 | Babylon Health Ltd.                                  | June 2017*    | Symptom analysis and diagnostic support                                                                                                                           | General Hospital         | England       | Small |
| C the Signs                             | C the Signs Ltd.                                     | June 2017*    | Assessment of symptoms to support cancer diagnosis                                                                                                                | General Hospital         | England       | Small |
| Imbio CT Lung Density Analysis Software | Imbio LLC.                                           | June 2017     | Tool to modify the contours of segmentation masks produced by Imbio algorithms or to manually create segmentation mask contours                                   | Radiology                | United States | Small |
| Sense System with IBT Electrodes        | Infinite Biomedical Technologies LLC.                | June 2017     | External prosthetic fittings of upper limbs                                                                                                                       | Neurology                | United States | Small |
| cNeuro cDSI                             | Combinostics Oy                                      | July 2017     | Dementia clinical decision support from MRI imaging biomarkers, CSF biomarkers and APOE gene                                                                      | Radiology                | Finland       | Small |
| Diadem                                  | BrainMiner Ltd.                                      | July 2017*    | Quantification of segmentable brain structures for dementia detection                                                                                             | Neurology                | England       | Small |
| Rapid Platform                          | iSchemaView Inc.                                     | August 2017   | Viewing, processing and analysis of functional and dynamic imaging datasets acquired with CT Perfusion, CT Angiography and MRI including a Diffusion Weighted MRI | Radiology                | United States | Small |

|                                       |                                                 |                |                                                                                                                                                                                 |                          |               |       |
|---------------------------------------|-------------------------------------------------|----------------|---------------------------------------------------------------------------------------------------------------------------------------------------------------------------------|--------------------------|---------------|-------|
| Quantib ND                            | Quantib BV                                      | September 2017 | Non-invasive medical imaging processing application intended for automatic labeling, visualization and volumetric quantification of segmentable brain structures from MR images | Radiology                | Netherlands   | Small |
| QyScore software                      | Qynapse SAS                                     | September 2017 | Automatic labeling, visualization and volumetric quantification of segmentable brain structures and lesions from MR images                                                      | Radiology                | France        | Small |
| vascuCAP                              | Elucid Bioimaging Inc.                          | October 2017   | Processing, review, analysis, communication and media interchange of images acquired from CT imaging devices                                                                    | Radiology                | United States | Small |
| D2P software                          | 3D Systems Inc.                                 | October 2017   | Software interface and image segmentation of DICOM imaging data                                                                                                                 | Radiology                | Israel        | Large |
| Dario Blood Glucose Monitoring System | LabStyle Innovations Ltd.                       | October 2017   | Quantitative measurement of glucose in blood samples                                                                                                                            | Clinical Chemistry       | United States | Small |
| ScanNav AI                            | MedaPhor Ltd.                                   | October 2017*  | Anatomical feature recognition from ultrasound images                                                                                                                           | Radiology                | England       | Small |
| Aidoc C-Spine                         | Aidoc Medical Ltd.                              | November 2017  | Cervical spine fracture detection support and triaging from CT scans                                                                                                            | Radiology                | Israel        | Small |
| Aidoc Intracranial Hemorrhage         | Aidoc Medical Ltd.                              | November 2017  | Workflow triage by flagging and communication of suspected findings of pathologies in head CT images, namely Intracranial Hemorrhage                                            | Radiology                | Israel        | Small |
| Veye Chest                            | Aidence BV                                      | December 2017  | Pulmonary nodule detection support from CT scans                                                                                                                                | Radiology                | Netherlands   | Small |
| VolparaDensity                        | Volpara Health Technologies Ltd.                | December 2017* | Based on digital breast x-ray systems, calculation and quantification of a density map and from that determination of volumetric breast density                                 | Radiology                | New Zealand   | Small |
| GI Genius                             | Medtronic Inc. (parent company: Medtronic plc.) | January 2018   | Colorectal cancer detection support                                                                                                                                             | Gastroenterology/Urology | United States | Large |
| Lvivo Toolbox                         | DiA Imaging Analysis Ltd.                       | January 2018   | Decision support tool for endocardial tracking resulting from ultrasound images                                                                                                 | Radiology                | Israel        | Small |
| QVCAD                                 | QView Medical Inc.                              | January 2018   | Aid to detect mammography-occult lesions in regions not known to have suspicious findings                                                                                       | Radiology                | United States | Small |
| Uscan                                 | EchoNous Inc.                                   | January 2018   | Non-invasive imaging of human body <a href="#">with ultrasound</a>                                                                                                              | Radiology                | United States | Small |

|                                       |                                                      |                |                                                                                                                                                                 |                    |               |       |
|---------------------------------------|------------------------------------------------------|----------------|-----------------------------------------------------------------------------------------------------------------------------------------------------------------|--------------------|---------------|-------|
| RadiomiX Clinical                     | OncoRadiomics SA                                     | January 2018   | Development and validation of image-based models for precision medicine                                                                                         | Radiology          | Belgium       | Small |
| deprexis - broca software             | GAIA AG                                              | January 2018*  | Automated digital therapy and personalised cognitive behavioural therapy interventions                                                                          | Neurology          | Germany       | Small |
| Rapid CTA                             | iSchemaView Inc.                                     | February 2018  | Identification of large vessel occlusions by automatically processing CT scans                                                                                  | Radiology          | United States | Small |
| DLCExpert                             | Mirada Medical Ltd.                                  | February 2018  | Contouring assistance for radiation therapy from CT scans                                                                                                       | Radiology          | England       | Small |
| Workflow Box                          | Mirada Medical Ltd.                                  | February 2018  | Route DICOM-compliant data to and from processing components                                                                                                    | Radiology          | England       | Small |
| syngo.MR Applications                 | Siemens Healthcare GmbH (parent company: Siemens AG) | February 2018* | Post-acquisition image processing software for viewing, manipulating, evaluating, and analyzing MR, MR-PET, CT, PET, CT-Pet images and MR spectra               | Radiology          | Germany       | Large |
| DreaMed Advisor Pro                   | DreaMed Diabetes Ltd.                                | February 2018  | Insulin dosing decision support for diabetes management                                                                                                         | Clinical Chemistry | Israel        | Small |
| PowerLook Tomo Detection (SecondLook) | iCAD Inc.                                            | February 2018  | Detection of soft tissue densities and calcifications in the 3D digital breast tomosynthesis slice                                                              | Radiology          | United States | Small |
| Air Next                              | NuvoAir AB                                           | March 2018     | Lung function and spirometry testing                                                                                                                            | Anesthesiology     | Sweden        | Small |
| HealthICH                             | Zebra Medical Vision Inc.                            | March 2018     | Software workflow tool designed to aid clinical assessment of adult non-contrast head CT with features suggestive of intracranial hemorrhage                    | Radiology          | Israel        | Small |
| HealthVCF                             | Zebra Medical Vision Inc.                            | March 2018     | Vertebral compression fracture detection support from CT scans                                                                                                  | Radiology          | Israel        | Small |
| Accipio Ix                            | MaxQ-AI Ltd.                                         | March 2018     | Aid in prioritizing clinical assessment of adult non-contrast head CT cases with features suggestive of acute intracranial hemorrhage in acute care environment | Radiology          | Israel        | Small |
| Early Sepsis Indicator                | Beckman Coulter Inc.                                 | April 2018     | Diagnostic and prediction algorithm for early sepsis detection                                                                                                  | Microbiology       | United States | Large |
| e-CTA                                 | Brainomix Ltd.                                       | April 2018     | Stroke imaging decision support from head CTA scans                                                                                                             | Radiology          | England       | Small |
| DRISTI                                | Artelus Ltd.                                         | April 2018     | Diabetic retinopathy detection support                                                                                                                          | Ophthalmic         | India         | Small |

|                                                 |                                                             |                |                                                                                                                                                                       |                    |               |       |
|-------------------------------------------------|-------------------------------------------------------------|----------------|-----------------------------------------------------------------------------------------------------------------------------------------------------------------------|--------------------|---------------|-------|
| HealthMammo                                     | Zebra Medical Vision Inc.                                   | May 2018       | Mammograms processed and analyzed for suspected breast cancer lesions                                                                                                 | Radiology          | Israel        | Small |
| BioMind                                         | Hanalytics Pte. Ltd.                                        | June 2018      | Assistance in the diagnosis of neurological disorders on MR and CT scans                                                                                              | Radiology          | Singapore     | Small |
| PowerLook Density Assessment (SecondLook)       | iCAD Inc.                                                   | June 2018      | Breast density evaluation to aid in the assessment of breast tissue composition                                                                                       | Radiology          | United States | Small |
| Lindera Mobilitätstest                          | Lindera GmbH                                                | July 2018      | Geriatric assessment to prevent falls                                                                                                                                 | General Hospital   | Germany       | Small |
| ACR                                             | Healthy.io Ltd.                                             | July 2018      | Wound analysis and management from smartphone image for direct patient use                                                                                            | Clinical Chemistry | Israel        | Small |
| Arterys Oncology DL                             | Arterys Inc.                                                | July 2018      | Support of oncological workflow by helping user confirm absence or presence of lesions; application supports anatomical datasets, such as CT or MR                    | Radiology          | United States | Small |
| FerriSmart Analysis System                      | Resonance Health Analysis Services Pty. Ltd.                | July 2018      | Measurement and monitoring of liver iron concentration and burden; aid in identification and monitoring of thalassemia                                                | Radiology          | Australia     | Small |
| Ada - Your Health Guide                         | Ada Health GmbH                                             | July 2018*     | Symptom analysis and diagnostic support                                                                                                                               | General Hospital   | Germany       | Small |
| Sight OLO                                       | Sight Diagnostics Ltd.                                      | July 2018      | Quantitative multi-parameter automated hematology analyzer intended for in vitro diagnostic use in screening capillary or venous whole blood samples                  | Hematology         | Israel        | Small |
| AIXPLORER Mach 30 Ultrasound Diagnostic Systems | Supersonic Imagine Inc.                                     | July 2018      | Ultrasound diagnostic systems and transducers intended for general purpose pulse echo ultrasound imaging, soft tissue elasticity imaging, doppler fluid flow analysis | Radiology          | France        | Small |
| DEEPVESSEL FFR                                  | Keya Medical Technology Corporation Ltd.                    | August 2018    | Assessment of the physiological functional assessment of the coronary arteries using coronary CTA scans                                                               | Cardiovascular     | China         | Small |
| Accu-Chek View                                  | Roche Diabetes Care GmbH (parent company: Roche Holding AG) | August 2018    | Diabetes monitoring and coaching tool                                                                                                                                 | General Hospital   | Germany       | Large |
| Medopad                                         | Huma Therapeutics Ltd.                                      | August 2018    | Remote patient monitoring platform through wearable and analytics platform                                                                                            | Cardiovascular     | England       | Small |
| Rayview                                         | Raylytic GmbH                                               | September 2018 | Image data analysis for diagnostic support                                                                                                                            | Radiology          | Germany       | Small |

|                                             |                                                                |                |                                                                                                                                                      |                          |               |       |
|---------------------------------------------|----------------------------------------------------------------|----------------|------------------------------------------------------------------------------------------------------------------------------------------------------|--------------------------|---------------|-------|
| Advanced intelligent Clear-IQ Engine (AiCE) | Canon Medical Systems Corporation (parent company: Canon Inc.) | September 2018 | Noise reduction algorithm that improves image quality and reduces image noise for abdomen, pelvis, chest, cardiac, extremities and head applications | Radiology                | Japan         | Large |
| Senhance Surgical System                    | TransEnterix Inc.                                              | October 2018   | Assistance in laparoscopic surgery                                                                                                                   | Gastroenterology/Urology | United States | Small |
| NightOwl                                    | Ectosense NV                                                   | October 2018   | Evaluation of sleep-related breathing disorders suggestive of sleep apnea                                                                            | Anesthesiology           | Belgium       | Small |
| Mia - Mammography Intelligent Assessment    | Kheiron Medical Technologies Ltd.                              | October 2018   | Breast cancer detection support from mammograms                                                                                                      | Radiology                | England       | Small |
| Fluoroshield                                | Omega Medical Imaging LLC.                                     | October 2018   | Modification device to provide an automated region of interest that reduces exposure to the patient and operator                                     | Radiology                | United States | Small |
| AmCAD-UT                                    | AmCad BioMed Corporation                                       | October 2018   | Assistance in analysis of thyroid ultrasound images                                                                                                  | Radiology                | Taiwan        | Small |
| AmCAD-UO                                    | AmCad BioMed Corporation                                       | October 2018   | Analysis and quantification of upper airway from ultrasound images                                                                                   | Radiology                | Taiwan        | Small |
| Cardisiograph                               | Cardisio GmbH                                                  | October 2018*  | Coronary heart disease screening test for diagnostic support                                                                                         | Cardiovascular           | Germany       | Small |
| Symptom Assessment                          | Doctorlink Ltd.                                                | October 2018*  | Assistance of patients to appropriate care pathway                                                                                                   | General Hospital         | England       | Small |
| AVATR                                       | Inavya Ventures Ltd.                                           | October 2018*  | Health and patient data unification                                                                                                                  | General Hospital         | England       | Small |
| Tyto Stethoscope                            | Tyto Care Ltd.                                                 | October 2018   | Electronic stethoscope that enables transmission of auscultation sound data                                                                          | General Hospital         | United States | Small |
| Invasive Tumor Detection APP                | Visiopharm A/S                                                 | October 2018   | Cytokeratin and p63 marker assessment for invasive and non-invasive tumor distinguishment                                                            | Pathology                | Denmark       | Small |
| Hot Spot APP                                | Visiopharm A/S                                                 | October 2018   | Hotspot scoring method for various cancer applications                                                                                               | Pathology                | Denmark       | Small |
| OXSIGHT Prism                               | OXSIGHT Ltd.                                                   | November 2018  | Smart glasses for people with a visual impairment                                                                                                    | Ophthalmic               | England       | Small |
| AI-ECG Platform                             | Shenzhen Carewell Electronics Ltd.                             | November 2018  | Assistance in measuring and interpreting 12-lead resting ECG                                                                                         | Cardiovascular           | China         | Small |
| DBLG1 System                                | diabeloop SA                                                   | November 2018  | Blood sugar management tool for Type 1 diabetes patients                                                                                             | General Hospital         | France        | Small |

|                                          |                                    |                |                                                                                                                                                                                        |                          |               |       |
|------------------------------------------|------------------------------------|----------------|----------------------------------------------------------------------------------------------------------------------------------------------------------------------------------------|--------------------------|---------------|-------|
| MRCP+                                    | Perspectum Diagnostics Ltd.        | December 2018  | Regions of variation of duct widths detection for diagnostic support from MRCP images                                                                                                  | Radiology                | England       | Small |
| QUIBIM Precision image analysis platform | Quibim SL                          | December 2018  | Imaging biomarker analysis and validation from CT scans                                                                                                                                | Radiology                | Spain         | Small |
| StoneChecker                             | Imaging Biometrics LLC.            | December 2018  | Kidney stone assessment tool based on non-contrast CT scans                                                                                                                            | Gastroenterology/Urology | England       | Small |
| SubtlePET                                | Subtle Medical Inc.                | December 2018  | Improvement of image quality by denoising in 25% of the original scan duration                                                                                                         | Radiology                | United States | Small |
| Delta Clinical                           | ki elements UG                     | December 2018  | Support for neuropsychological tests                                                                                                                                                   | Neurology                | Germany       | Small |
| Pegasus-disc                             | Visulytix Ltd.                     | December 2018* | Retinal image analysis for diagnostic support                                                                                                                                          | Ophthalmic               | England       | Small |
| IB Lab Koala                             | IB Lab GmbH                        | January 2019   | Radiological fully-automated image processing software device of computed or directly digital images intended to aid medical professionals in measurement of minimum joint space width | Radiology                | Austria       | Small |
| mdbrain                                  | mediaire GmbH                      | January 2019   | Early detection and differentiation of dementia support from MR images                                                                                                                 | Neurology                | Germany       | Small |
| Implicity                                | Implicity SAS                      | January 2019   | Assisted remote monitoring for cardiovascular patients                                                                                                                                 | Cardiovascular           | France        | Small |
| ChestEye Imaging Suite                   | Oxipit UAB                         | January 2019   | Lung disease detection and reporting for diagnostic support from X-ray images                                                                                                          | Radiology                | Lithuania     | Small |
| cvi42 for Cardiac MRI                    | Circle Cardiovascular Imaging Inc. | February 2019  | Post-processing tool to assess heart function, flow and tissue attributes from MRI images                                                                                              | Radiology                | Canada        | Small |
| cvi42 for Cardiac CT                     | Circle Cardiovascular Imaging Inc. | February 2019  | Post-processing tool to assess heart function, flow and tissue attributes from CT images                                                                                               | Radiology                | Canada        | Small |
| MUSICA                                   | Agfa HealthCare NV                 | February 2019  | Performance of dynamic imaging examinations (fluoroscopy and/or rapid sequence)                                                                                                        | Radiology                | Belgium       | Large |
| DERM                                     | Skin Analytics Ltd.                | February 2019* | Skin cancer diagnosis support                                                                                                                                                          | General Hospital         | England       | Small |
| ART-Plan.annotate                        | TheraPanacea SAS                   | February 2019  | Contouring of tumor and surrounding organs for radiotherapy                                                                                                                            | General Hospital         | France        | Small |
| R-One                                    | Robocath SAS                       | February 2019  | Robotic system for treatment of vascular diseases                                                                                                                                      | Cardiovascular           | France        | Small |

|                                                   |                                                              |               |                                                                                                                                          |                  |               |       |
|---------------------------------------------------|--------------------------------------------------------------|---------------|------------------------------------------------------------------------------------------------------------------------------------------|------------------|---------------|-------|
| Aidoc Pulmonary Embolism                          | Aidoc Medical Ltd.                                           | February 2019 | Radiological computer aided triage and notification software indicated for use in the analysis of head CTA images                        | Radiology        | Israel        | Small |
| Altoida NMI                                       | Altoida Inc.                                                 | March 2019    | Mild Cognitive Impairment/Prodromal Alzheimer's Disease detection support                                                                | Neurology        | United States | Small |
| KardiaAI                                          | AliveCor Inc.                                                | March 2019    | Ambulatory ECG rhythm assessment                                                                                                         | Cardiovascular   | United States | Small |
| PixelShine                                        | AlgoMedica Inc.                                              | March 2019    | Networking, communication, processing and enhancement of CT images in DICOM format                                                       | Radiology        | United States | Small |
| OphtAI                                            | Evolucare Technologies SAS                                   | March 2019    | Screening of eye pathologies for diagnostic support                                                                                      | Ophthalmic       | France        | Small |
| StethoMe                                          | StethoMe sp. z o.o.                                          | March 2019    | Sound analysis for diagnostic support                                                                                                    | General Hospital | Poland        | Small |
| ECG App                                           | Apple Inc.                                                   | March 2019    | To create, record, store, transfer, and display ECG; determines presence of atrial fibrillation or sinus rhythm on classifiable waveform | Cardiovascular   | United States | Large |
| Irregular Rhythm Notification Feature             | Apple Inc.                                                   | March 2019    | Analysis of pulse rate data to identify episodes of irregular heart rhythms suggestive of atrial fibrillation                            | Cardiovascular   | United States | Large |
| Accipio ax                                        | MaxQ-AI Ltd.                                                 | March 2019    | Intercranial hemorrhage clinical assessment support from CT scans                                                                        | Radiology        | Israel        | Small |
| Poseidon Ultrasound System                        | Butterfly Network Inc.                                       | April 2019    | Diagnostic ultrasound imaging and measurement of anatomical structures and fluids                                                        | Radiology        | United States | Small |
| Myo Plus                                          | Otto Bock Healthcare Products GmbH                           | April 2019    | Exoprosthetic fittings of the upper limbs                                                                                                | Neurology        | Austria       | Large |
| Auto Lung Nodule Detection                        | Samsung Electronics Co. Ltd. (parent company: Samsung Group) | April 2019    | Lung nodule detection for diagnostic support from X-ray images                                                                           | Radiology        | South Korea   | Large |
| Bone Suppression                                  | Samsung Electronics Co. Ltd. (parent company: Samsung Group) | April 2019    | Bone suppression algorithm for improvement of tissue imaging from X-ray images                                                           | Radiology        | South Korea   | Large |
| Imbio CT Lung Texture Analysis (Caliper) Software | Imbio LLC.                                                   | April 2019    | ILD's and other fibrotic condition identification support from CT scans                                                                  | Radiology        | United States | Small |

|                                   |                                                                               |             |                                                                                                                                                                  |                |               |       |
|-----------------------------------|-------------------------------------------------------------------------------|-------------|------------------------------------------------------------------------------------------------------------------------------------------------------------------|----------------|---------------|-------|
| BladderScan PRIME PLUS            | Verathon Inc.                                                                 | April 2019* | Ultrasound device intended to be used for measuring the urine volume in the bladder noninvasively                                                                | Radiology      | United States | Large |
| syngo.Breast Care                 | Siemens Healthcare GmbH (parent company: Siemens AG)                          | May 2019    | Reading and reporting for diagnostic support from mammograms                                                                                                     | Radiology      | Germany       | Large |
| Syngo CT CaScoring                | Siemens Healthcare GmbH (parent company: Siemens AG)                          | May 2019    | Evaluation and documentation of calcified coronary lesions using CT scans                                                                                        | Radiology      | Germany       | Large |
| CLARUS 700                        | Carl Zeiss Meditec Inc.                                                       | May 2019    | Capture, display, annotate and store images to aid in diagnosis and monitoring of diseases and disorders occurring in retina, ocular surfaces and visible adnexa | Ophthalmic     | United States | Large |
| syngo.CT Cardiac Planning         | Siemens Healthcare GmbH (parent company: Siemens AG)                          | May 2019    | Image analysis software package for evaluating contrast enhanced CT images; analysis of morphology and pathology of vascular and cardiac structures              | Radiology      | Germany       | Large |
| Painchek                          | PainChek Ltd.                                                                 | May 2019    | Assessment of facial movements for pain assessment                                                                                                               | Neurology      | Australia     | Small |
| HealthPNX                         | Zebra Medical Vision Inc.                                                     | May 2019    | Pneumothorax detection support and alert for urgent findings from X-ray images                                                                                   | Radiology      | Israel        | Small |
| eMurmur ID                        | CSD Labs GmbH                                                                 | May 2019    | Detection and identification of heart murmurs                                                                                                                    | Cardiovascular | Austria       | Small |
| JPC-01K                           | JLK Inspection Inc.                                                           | May 2019    | Prostate cancer detection for diagnostic support from MRI images                                                                                                 | Radiology      | South Korea   | Small |
| JBS-01K                           | JLK Inspection Inc.                                                           | May 2019    | Ischemic stroke detection for diagnostic support from MRI images                                                                                                 | Radiology      | South Korea   | Small |
| syngo.via RT Image Suite          | Siemens Healthcare GmbH (parent company: Siemens AG)                          | May 2019    | 3D and 4D image visualization, multimodality manipulation and contouring tool that helps preparation and response assessment of treatments                       | Radiology      | Germany       | Large |
| Smartho-D2 Electronic Stethoscope | Hefei Mintti Medical Technology Co. Ltd.                                      | June 2019   | Detection and amplification of sounds from heart, lungs, and other internal organs with use of a selective frequency                                             | Anesthesiology | China         | Small |
| Rayvolve                          | AZMed SAS                                                                     | June 2019   | Bone lesion detection support from X-ray images                                                                                                                  | Radiology      | France        | Small |
| Illumeo System                    | Philips Medical Systems Nederland BV (parent company: Koninklijke Philips NV) | June 2019*  | Image management system to acquire, store, distribute, process and display images and associated data throughout clinical environment                            | Radiology      | Netherlands   | Large |



|                                              |                                                                                                            |             |                                                                                                                                            |                  |               |       |
|----------------------------------------------|------------------------------------------------------------------------------------------------------------|-------------|--------------------------------------------------------------------------------------------------------------------------------------------|------------------|---------------|-------|
| Innersight3D                                 | InnersightLabs Ltd.                                                                                        | June 2019*  | Modelling technology for surgery planning using models from MRI and CT scans                                                               | Radiology        | England       | Small |
| SOZO                                         | ImpediMed Ltd.                                                                                             | June 2019   | Aid to clinical assessment of unilateral lymphedema                                                                                        | Cardiovascular   | Australia     | Large |
| Epihunter                                    | epihunter NV                                                                                               | June 2019   | Absence seizure detection                                                                                                                  | Neurology        | Belgium       | Small |
| Complete Control System Gen2                 | Coapt LLC.                                                                                                 | June 2019   | External prosthetic fittings of the upper limbs                                                                                            | Neurology        | United States | Small |
| RevealAI-Lung                                | Mindshare Medical Inc.                                                                                     | June 2019   | Risk assessment tool for lung cancer detection support from CT scans                                                                       | Radiology        | United States | Small |
| Venue Ultrasound                             | GE Medical Systems Ultrasound and Primary Care Diagnostics Inc. (parent company: General Electric Company) | July 2019   | Ultrasound imaging, measurement and analysis of the human body and fluid for clinical applications                                         | Radiology        | United States | Large |
| VentriPoint Medical System Plus (VMS+)       | Ventripoint Diagnostics Ltd.                                                                               | July 2019   | Intended to record, analyze, store and retrieve digital ultrasound images for computerized 3D image processing                             | Cardiovascular   | Canada        | Small |
| ProFound AI for 2D Mammography               | iCAD Inc.                                                                                                  | July 2019   | Breast cancer detection assistance and workflow solution from 2D mammograms                                                                | Radiology        | United States | Small |
| ProFound AI for Digital Breast Tomosynthesis | iCAD Inc.                                                                                                  | July 2019   | Computer-assisted detection and diagnosis (CAD) software device intended to be used while reading digital breast tomosynthesis (DBT) exams | Radiology        | United States | Small |
| Altris AI                                    | Altris Inc.                                                                                                | July 2019   | Retinal conditions detection for diagnostic support                                                                                        | Ophthalmic       | United States | Small |
| Bone VCAR (BVCAR)                            | GE Medical Systems SCS (parent company: General Electric Company)                                          | August 2019 | Post processing application for use in the analysis of CT spine images                                                                     | Radiology        | France        | Large |
| Deep Learning Image Reconstruction           | GE Healthcare Japan Corporation (parent company: General Electric Company)                                 | August 2019 | Image reconstruction method intended to produce cross-sectional images of the head and body                                                | Radiology        | Japan         | Large |
| ResAppDx-EU                                  | ResApp Health Ltd.                                                                                         | August 2019 | Analysis of patients' cough sounds for diagnostic support                                                                                  | General Hospital | Australia     | Small |
| Ethos Radiotherapy Treatment                 | Varian Medical Systems Inc.                                                                                | August 2019 | Managing and monitoring radiation therapy treatment plans and sessions                                                                     | Radiology        | United States | Large |

|                                                  |                                                                    |                |                                                                                                                                                    |                       |             |       |
|--------------------------------------------------|--------------------------------------------------------------------|----------------|----------------------------------------------------------------------------------------------------------------------------------------------------|-----------------------|-------------|-------|
| AI-Rad Companion Chest CT                        | Siemens Healthcare GmbH<br>(parent company: Siemens AG)            | August 2019*   | Image processing software that provides analysis from CT images to support physicians in evaluation and assessment of cardiovascular diseases      | Radiology             | Germany     | Large |
| AI-Rad Companion Engine                          | Siemens Healthcare GmbH<br>(parent company: Siemens AG)            | August 2019*   | Software platform that provides basic visualization and enables external post-processing extension for medical images used for diagnostic purposes | Radiology             | Germany     | Large |
| AI-Rad Companion Cardiovascular                  | Siemens Healthcare GmbH<br>(parent company: Siemens AG)            | August 2019*   | Image processing software for analysis from CT images to support physicians in evaluation and assessment of cardiovascular diseases                | Radiology             | Germany     | Large |
| AI-Rad Companion Musculoskeletal                 | Siemens Healthcare GmbH<br>(parent company: Siemens AG)            | August 2019*   | Thorax processing software for diagnostic support from CT scans                                                                                    | Radiology             | Germany     | Large |
| AVEC (Automated Visual Evaluation of the Cervix) | MobileODT Ltd.                                                     | September 2019 | Cervical cancer screening support for diagnostic support                                                                                           | Obstetrics/Gynecology | Israel      | Small |
| Breast-SlimView                                  | Hera-MI SAS                                                        | September 2019 | Breast cancer detection for diagnostic support from mammograms                                                                                     | Radiology             | France      | Small |
| JLD-01K                                          | JLK Inspection Inc.                                                | September 2019 | Lung disease detection for diagnostic support from CT scans                                                                                        | Radiology             | South Korea | Small |
| JLD-02K                                          | JLK Inspection Inc.                                                | September 2019 | Lung disease detection for diagnostic support from X-ray images                                                                                    | Radiology             | South Korea | Small |
| JBA-01K                                          | JLK Inspection Inc.                                                | September 2019 | Cerebral aneurysm detection for diagnostic support from MR angiogram (MRA)                                                                         | Radiology             | South Korea | Small |
| JBS-04K                                          | JLK Inspection Inc.                                                | September 2019 | Hemorrhagic stroke detection for diagnostic support from CT scans                                                                                  | Radiology             | South Korea | Small |
| JAD-02K                                          | JLK Inspection Inc.                                                | September 2019 | Cortical thickness quantification for diagnostic support from MRI images                                                                           | Radiology             | South Korea | Small |
| MRCAT Brain                                      | Philips Medical Systems MR Finland<br>(parent company: Philips NV) | September 2019 | Radiation therapy planning through automated image segmentation for brain tumor patients                                                           | Radiology             | Finland     | Large |
| ArtiQ.PFT                                        | ArtiQ NV                                                           | September 2019 | Interpretation of pulmonary function tests (PFTs) for diagnostic support                                                                           | General Hospital      | Belgium     | Small |

|                                                                                  |                                                                                |                |                                                                                                                                                                                                                                 |                  |               |       |
|----------------------------------------------------------------------------------|--------------------------------------------------------------------------------|----------------|---------------------------------------------------------------------------------------------------------------------------------------------------------------------------------------------------------------------------------|------------------|---------------|-------|
| QLAB Advanced Quantification Software                                            | Philips Medical Systems Nederland BV (parent company: Koninklijke Philips NV)  | September 2019 | Viewing and quantification of image data acquired on Philips ultrasound systems                                                                                                                                                 | Radiology        | United States | Large |
| QbCheck                                                                          | QBTECH AB                                                                      | September 2019 | Aid in the clinical assessment of ADHD and in the evaluation of treatment interventions in patients with ADHD                                                                                                                   | Neurology        | Sweden        | Small |
| Vara                                                                             | Merantix Healthcare GmbH                                                       | September 2019 | Breast cancer screening support and triaging from mammograms                                                                                                                                                                    | Radiology        | Germany       | Small |
| APAS Independence instrument                                                     | Clever Culture Systems AG                                                      | September 2019 | Automates urine culture plate imaging and interpretation to detect presence or absence of microbial growth                                                                                                                      | Microbiology     | Switzerland   | Small |
| Aidoc Large Vessel Occlusion                                                     | Aidoc Medical Ltd.                                                             | September 2019 | Workflow triage by flagging and communication of suspected positive findings of Large Vessel Occlusion (LVO) pathologies                                                                                                        | Radiology        | Israel        | Small |
| Concentriq Dx                                                                    | Proscia Inc.                                                                   | October 2019   | Computational pathology image-based workflow automation                                                                                                                                                                         | General Hospital | United States | Small |
| NuVasive Pulse System                                                            | NuVasive Inc.                                                                  | October 2019   | Intraoperative neurophysiologic monitoring during spinal surgery, neck dissection, thoracic surgeries, and upper and lower extremities                                                                                          | Neurology        | United States | Large |
| DXA Diagnostic Assistant                                                         | Dialogue Technologies Inc.                                                     | October 2019   | Triage scoring based on patient history                                                                                                                                                                                         | General Hospital | Canada        | Small |
| NvisionVLE Imaging System, NvisionVLE Optical Probe, NvisionVLE Inflation System | NinePoint Medical Inc.                                                         | October 2019*  | Imaging tool in the evaluation of human tissue microstructure, including esophageal tissue microstructure, by providing two-dimensional, cross-sectional, real-time depth visualization and may be used to mark areas of tissue | Radiology        | United States | Small |
| DeepDx-Prostate Connect                                                          | Deep Bio Inc.                                                                  | October 2019   | Recognition of acinar adenocarcinoma of the prostate                                                                                                                                                                            | Pathology        | South Korea   | Small |
| ClariCT.AI                                                                       | ClariPI Inc.                                                                   | October 2019   | Networking, communication, processing and enhancement of CT images                                                                                                                                                              | Radiology        | South Korea   | Small |
| Auto Positioning                                                                 | GE Hangwei Medical Systems Co. Ltd. (parent company: General Electric Company) | November 2019  | Provide consistent patient positioning for optimal image quality and automatic exposure control                                                                                                                                 | Radiology        | China         | Large |

|                             |                                                                                                       |               |                                                                                                                                          |                  |               |       |
|-----------------------------|-------------------------------------------------------------------------------------------------------|---------------|------------------------------------------------------------------------------------------------------------------------------------------|------------------|---------------|-------|
| LiverMultiScan              | Perspectum Diagnostics Ltd.                                                                           | November 2019 | MR diagnostic device software application for non-invasive liver evaluation                                                              | Radiology        | England       | Small |
| RBKnee                      | Radiobotics ApS                                                                                       | November 2019 | Automatic detection of radiographic osteoarthritis markers from X-ray images                                                             | Radiology        | Denmark       | Small |
| Centricity Universal Viewer | GE Healthcare Inc. (parent company: General Electric Company)                                         | November 2019 | Display of medical images and data from various imaging sources and from other healthcare information sources                            | Radiology        | United States | Large |
| Automatic View Recognition  | GE Medical Systems Ultrasound and Primary Care Diagnostics (parent company: General Electric Company) | November 2019 | Automated workflow improvement tool for Vivid E95 / Vivid E90 general-purpose ultrasound systems, specialized for use in cardiac imaging | Radiology        | United States | Large |
| AI-ECG Tracker              | Shenzhen Carewell Electronics Co. Ltd.                                                                | November 2019 | Assessment of arrhythmias using ECG data acquired from adults without pacemakers                                                         | Cardiovascular   | China         | Small |
| Paige Prostate              | Paige Inc.                                                                                            | November 2019 | Cancer detection in prostate needle biopsies                                                                                             | Pathology        | United States | Small |
| Paige Insight               | Paige Inc.                                                                                            | November 2019 | Digital pathology viewer for diagnostic support                                                                                          | Pathology        | United States | Small |
| Lunit INSIGHT CXR 3         | Lunit Inc.                                                                                            | November 2019 | Chest abnormality detection tool from X-ray images                                                                                       | Radiology        | South Korea   | Small |
| DentaliQ ortho              | CellmatiQ GmbH                                                                                        | November 2019 | Pre-analysis of various jaw and tooth positions                                                                                          | Dental           | Germany       | Small |
| Kata                        | VisionHealth GmbH                                                                                     | November 2019 | Assessment of inhalation for asthma                                                                                                      | General Hospital | Germany       | Small |
| KroniKare Wound Imager      | KroniKare Pte. Ltd.                                                                                   | November 2019 | Chronic wound care and management                                                                                                        | General Hospital | Singapore     | Small |
| Icobrain-CTP                | Icometrix NV                                                                                          | December 2019 | Analysis and communication capabilities for dynamic imaging datasets that are acquired with CT Perfusion imaging protocols               | Radiology        | Belgium       | Small |
| VSI Holomedicine            | apoQlar GmbH                                                                                          | December 2019 | Surgery support through mixed reality                                                                                                    | General Hospital | Germany       | Small |
| VISUHEALTH - AI DR          | Carl Zeiss Meditec Inc.                                                                               | December 2019 | Support tool for glaucoma hemifield test                                                                                                 | Ophthalmic       | Germany       | Large |
| wheezo                      | RESPIRI Ltd.                                                                                          | December 2019 | Asthma management and remote monitoring tool                                                                                             | General Hospital | Australia     | Small |
| INFINITT PACS 7.0           | Infinitt Healthcare Co. Ltd.                                                                          | December 2019 | Image analysis and operational workflow improvement tool                                                                                 | Radiology        | South Korea   | Large |

|                                       |                                                                       |               |                                                                                                                                                                               |                          |             |       |
|---------------------------------------|-----------------------------------------------------------------------|---------------|-------------------------------------------------------------------------------------------------------------------------------------------------------------------------------|--------------------------|-------------|-------|
| Discovery AI                          | Pentax Medical GmbH (parent company: Pentax Corporation)              | December 2019 | Polyp detection support during a colorectal examination                                                                                                                       | Gastroenterology/Urology | Germany     | Small |
| HealthCXR                             | Zebra Medical Vision Inc.                                             | December 2019 | Software workflow tool to aid clinical assessment of adult chest X-ray with features suggestive of pleural effusion                                                           | Radiology                | Israel      | Small |
| Integrated Cognitive Assessment (ICA) | Cognetivity Neurosciences Ltd.                                        | December 2019 | Early-stage dementia diagnostic support                                                                                                                                       | Neurology                | England     | Small |
| RayStation                            | RaySearch Laboratories AB                                             | December 2019 | Treatment planning and analysis of radiation therapy                                                                                                                          | Radiology                | Sweden      | Large |
| RayCare 2.3                           | RaySearch Laboratories AB                                             | December 2019 | Support of workflows, scheduling and clinical information management for oncology care and follow-up                                                                          | Radiology                | Sweden      | Large |
| StrokeViewer                          | Nico.lab BV                                                           | December 2019 | Localization and quantification of stroke biomarkers from CT scans                                                                                                            | Radiology                | Netherlands | Small |
| MEDIP PRO                             | MEDICALIP Co. Ltd.                                                    | December 2019 | Software interface and image segmentation system for transfer of DICOM imaging information from medical scanner to output file; pre-operative software for treatment planning | Radiology                | South Korea | Small |
| JBD-01K                               | JLK Inspection Inc.                                                   | January 2020  | Breast cancer detection for diagnostic support from mammograms                                                                                                                | Radiology                | South Korea | Small |
| AI-Pathway Companion Prostate Cancer  | Siemens Healthcare GmbH (parent company: Siemens AG)                  | January 2020* | Prostate cancer detection for diagnostic support                                                                                                                              | General Hospital         | Germany     | Large |
| InferRead CT Lung                     | Beijing Infervision Technology Co. Ltd.                               | February 2020 | Lung cancer screening and management tool from CT scans                                                                                                                       | Radiology                | China       | Small |
| b-box                                 | b-rayZ GmbH                                                           | February 2020 | Assessment of mammography image quality and breast density from mammograms                                                                                                    | Radiology                | Switzerland | Small |
| aBSI                                  | EXINI Diagnostics AB (parent company: Progenics Pharmaceuticals Inc.) | February 2020 | General picture archiving and communications system tools including applications for lesion marking and quantitative analysis of nuclear medicine imaging                     | Radiology                | Sweden      | Small |
| CINA ICH                              | Avicenna.AI SAS                                                       | February 2020 | Detection and prioritization of acute intracerebral hemorrhage on non-contrast CT                                                                                             | Radiology                | France      | Small |
| CINA LVO                              | Avicenna.AI SAS                                                       | February 2020 | Detection and prioritization of acute intracerebral hemorrhage on non-contrast CT                                                                                             | Radiology                | France      | Small |

|                                             |                                                                      |               |                                                                                                                                                            |                          |               |       |
|---------------------------------------------|----------------------------------------------------------------------|---------------|------------------------------------------------------------------------------------------------------------------------------------------------------------|--------------------------|---------------|-------|
| Medicus                                     | Medicus AI GmbH                                                      | February 2020 | Health and medical data interpretation support tool                                                                                                        | General Hospital         | Austria       | Small |
| Metastasis Detection App                    | Visiopharm A/S                                                       | February 2020 | Metastasis detection in lymph nodes for colorectal and breast adenocarcinoma                                                                               | Pathology                | Denmark       | Small |
| BioBeats                                    | Huma Therapeutics Ltd.                                               | February 2020 | Remote patient monitoring tool for cardiac patients                                                                                                        | Cardiovascular           | England       | Small |
| Retinal Image Intelligent Analysis Software | Airdoc Inc.                                                          | February 2020 | Diabetic retinopathy detection support                                                                                                                     | Ophthalmic               | China         | Small |
| Galen Prostate                              | Ibex Medical Analytics Ltd.                                          | February 2020 | Identification of suspected cancer on prostate core needle biopsies                                                                                        | Pathology                | Israel        | Small |
| Sens.ai                                     | Future Processing Healthcare sp. z o.o.                              | March 2020    | Segmentation and calculation of the volume of the brain lesions                                                                                            | Neurology                | Poland        | Small |
| BoneView                                    | Gleamer.AI SAS                                                       | March 2020    | Bone fracture detection from x-ray images                                                                                                                  | Radiology                | France        | Small |
| CAD EYE                                     | FUJIFILM Europe GmbH (parent company: Fujifilm Holdings Corporation) | March 2020    | Colonic polyps detection and characterization support during a colonoscopy                                                                                 | Gastroenterology/Urology | Germany       | Large |
| EchoGo Pro                                  | Ultromics Ltd.                                                       | March 2020    | Cardiovascular function assessment for diagnostic support from ultrasound images                                                                           | Cardiovascular           | England       | Small |
| EarlyVue VS30                               | Philips Medizin Systeme Boeblingen GmbH (parent company: Philips NV) | March 2020    | Measure, display, alarm and record physiological information                                                                                               | Radiology                | Germany       | Large |
| Automated Retinal Disease Assessment        | Verily Life Sciences LLC. (parent company: Alphabet Inc.)            | March 2020*   | Screening tool for diabetic retinopathy detection                                                                                                          | Ophthalmic               | United States | Large |
| KOSMOS                                      | EchoNous Inc.                                                        | March 2020    | Clinical assessment of cardiac and pulmonary systems and abdomen by acquiring ultrasound images, ECG rhythms and digital auscultation sounds and waveforms | Cardiovascular           | United States | Small |

† The summary was extracted from summaries of governmental websites or news outlets. The information is not comprehensive. Please consult the governments' websites or contact the manufacturers for further information.

\* AI/ML-based medical devices for which the registration date is listed since the CE marking date could not be verified.

Comparison of baseline characteristics of FDA approved device categories

| Characteristic                          | 510(k)<br>n = 204 | De novo<br>n = 15 | PMA<br>n = 3 | Chi square tests of<br>independence                                |
|-----------------------------------------|-------------------|-------------------|--------------|--------------------------------------------------------------------|
| <b>Country of Origin (n%)</b>           |                   |                   |              | $\chi^2(42) = 12.7$<br>$p = 1.00$<br>$\varphi = 0.17$<br>$n = 222$ |
| Australia                               | 3 (1.5)           | 0 (0)             | 0 (0)        |                                                                    |
| Austria                                 | 3 (1.5)           | 0 (0)             | 0 (0)        |                                                                    |
| Belgium                                 | 5 (2.5)           | 0 (0)             | 0 (0)        |                                                                    |
| Canada                                  | 6 (2.9)           | 0 (0)             | 0 (0)        |                                                                    |
| China                                   | 5 (2.5)           | 0 (0)             | 0 (0)        |                                                                    |
| Denmark                                 | 1 (0.5)           | 0 (0)             | 0 (0)        |                                                                    |
| England                                 | 9 (4.4)           | 0 (0)             | 0 (0)        |                                                                    |
| Finland                                 | 2 (1.0)           | 0 (0)             | 0 (0)        |                                                                    |
| France                                  | 8 (3.9)           | 0 (0)             | 0 (0)        |                                                                    |
| Germany                                 | 2 (1.0)           | 0 (0)             | 0 (0)        |                                                                    |
| Israel                                  | 15 (7.4)          | 1 (6.7)           | 0 (0)        |                                                                    |
| Italy                                   | 2 (1.0)           | 0 (0)             | 0 (0)        |                                                                    |
| Japan                                   | 2 (1.0)           | 0 (0)             | 0 (0)        |                                                                    |
| Netherlands                             | 4 (2.0)           | 0 (0)             | 0 (0)        |                                                                    |
| New Zealand                             | 1 (0.5)           | 0 (0)             | 0 (0)        |                                                                    |
| Singapore                               | 2 (1.0)           | 0 (0)             | 0 (0)        |                                                                    |
| South Korea                             | 3 (1.5)           | 0 (0)             | 0 (0)        |                                                                    |
| Spain                                   | 1 (0.5)           | 0 (0)             | 0 (0)        |                                                                    |
| Sweden                                  | 10 (4.9)          | 0 (0)             | 0 (0)        |                                                                    |
| Switzerland                             | 3 (1.5)           | 1 (6.7)           | 0 (0)        |                                                                    |
| Taiwan                                  | 7 (3.4)           | 0 (0)             | 0 (0)        |                                                                    |
| United States                           | 110 (54)          | 13 (87)           | 3 (100)      |                                                                    |
| <b>Professional or Patient Use (n%)</b> |                   |                   |              | $\chi^2(4) = 6.63$<br>$p = 0.16$<br>$\varphi = 0.12$<br>$n = 222$  |
| Healthcare Professional                 | 177 (87)          | 10 (67)           | 2 (67)       |                                                                    |
| Healthcare Professional and Patient     | 10 (4.9)          | 2 (13)            | 0 (0)        |                                                                    |
| Patient                                 | 17 (8.3)          | 3 (20)            | 1 (33)       |                                                                    |

| <b>Medical Specialty (n%)</b> |          |         |        | $\chi^2(26) = 45.1$ |
|-------------------------------|----------|---------|--------|---------------------|
| Anesthesiology                | 7 (3.4)  | 0 (0)   | 0 (0)  | $p = 0.011$         |
| Cardiovascular                | 35 (17)  | 5 (33)  | 0 (0)  | $\varphi = 0.32$    |
| Clinical Chemistry            | 4 (2.0)  | 1 (6.7) | 1 (33) | $n = 222$           |
| Clinical Toxicology           | 1 (0.5)  | 0 (0)   | 0 (0)  |                     |
| Dental                        | 1 (0.5)  | 0 (0)   | 0 (0)  |                     |
| Gastroenterology/Urology      | 1 (0.5)  | 0 (0)   | 0 (0)  |                     |
| General Hospital              | 2 (1.0)  | 0 (0)   | 0 (0)  |                     |
| Hematology                    | 5 (2.5)  | 0 (0)   | 0 (0)  |                     |
| Microbiology                  | 4 (2.0)  | 0 (0)   | 0 (0)  |                     |
| Molecular Genetics            | 0 (0)    | 1 (6.7) | 0 (0)  |                     |
| Neurology                     | 19 (9.3) | 2 (13)  | 0 (0)  |                     |
| Obstetrics/Gynecology         | 1 (0.5)  | 1 (6.7) | 0 (0)  |                     |
| Ophthalmic                    | 1 (0.5)  | 1 (6.7) | 0 (0)  |                     |
| Radiology                     | 123 (60) | 4 (27)  | 2 (67) |                     |
| <b>Manufacturer Size (n%)</b> |          |         |        | $\chi^2(2) = 0.26$  |
| Small                         | 158 (77) | 12 (80) | 2 (67) | $p = 0.88$          |
| Large                         | 46 (23)  | 3 (20)  | 1 (33) | $\varphi = 0.034$   |
|                               |          |         |        | $n = 222$           |

$\chi^2(N)$  = Pearson's chi-square coefficient, N = degrees of freedom. p = model significance (significant when p < 0.05).  $\varphi$  = effect size (Cramer's V). n = total sample size.



Post-hoc analyses of significant chi-square statistics for FDA approved devices

| Characteristic             | 510(k)<br>n = 204 | De novo<br>n = 15 | PMA<br>n = 3 |
|----------------------------|-------------------|-------------------|--------------|
| <b>Medical Specialty</b>   |                   |                   |              |
| Anesthesiology             |                   |                   |              |
| <i>residuals</i>           | 0.80              | -0.72             | -0.31        |
| <i>p-values</i>            | 1.00              | 1.00              | 1.00         |
| Cardiology                 |                   |                   |              |
| <i>residuals</i>           | -1.12             | 1.60              | -0.82        |
| <i>p-values</i>            | 1.00              | 1.00              | 1.00         |
| Clinical Chemistry         |                   |                   |              |
| <i>residuals</i>           | -2.30             | 0.98              | 3.29         |
| <i>p-values</i>            | 0.91              | 1.00              | 0.04         |
| Clinical Toxicology        |                   |                   |              |
| <i>residuals</i>           | 0.30              | -0.27             | -0.12        |
| <i>p-values</i>            | 1.00              | 1.00              | 1.00         |
| Dental                     |                   |                   |              |
| <i>residuals</i>           | 0.30              | -0.27             | -0.12        |
| <i>p-values</i>            | 1.00              | 1.00              | 1.00         |
| Gastroenterology / Urology |                   |                   |              |
| <i>residuals</i>           | 0.30              | -0.27             | -0.12        |
| <i>p-values</i>            | 1.00              | 1.00              | 1.00         |
| General Hospital           |                   |                   |              |
| <i>residuals</i>           | 0.42              | -0.38             | -0.17        |
| <i>p-values</i>            | 1.00              | 1.00              | 1.00         |
| Hematology                 |                   |                   |              |
| <i>residuals</i>           | 0.67              | -0.61             | -0.26        |
| <i>p-values</i>            | 1.00              | 1.00              | 1.00         |
| Microbiology               |                   |                   |              |
| <i>residuals</i>           | 0.60              | -0.54             | -0.24        |
| <i>p-values</i>            | 1.00              | 1.00              | 1.00         |
| Molecular Genetics         |                   |                   |              |
| <i>residuals</i>           | -3.38             | 3.73              | -0.12        |

|                         |       |       |       |
|-------------------------|-------|-------|-------|
| <i>p-values</i>         | 0.03  | 0.008 | 1.00  |
| Neurology               |       |       |       |
| <i>residuals</i>        | -0.25 | 0.53  | -0.56 |
| <i>p-values</i>         | 1.00  | 1.00  | 1.00  |
| Obstetrics / Gynecology |       |       |       |
| <i>residuals</i>        | -2.18 | 2.45  | -0.17 |
| <i>p-values</i>         | 1.00  | 0.60  | 1.00  |
| Ophthalmic              |       |       |       |
| <i>residuals</i>        | -2.18 | 2.45  | -0.17 |
| <i>p-values</i>         | 1.00  | 0.60  | 1.00  |
| Radiology               |       |       |       |
| <i>residuals</i>        | 2.22  | -2.56 | 0.30  |
| <i>p-values</i>         | 1.00  | 0.44  | 1.00  |

---

p = model significance (significant when  $p < 0.05$ ).

Comparison of baseline characteristics of CE marked device categories

| Characteristic                | Class I<br>n = 85 | Class IIa<br>n = 95 | Class IIb<br>n = 28 | Class III<br>n = 2 | Class IVD<br>n = 11 | Chi square tests of<br>independence                                 |
|-------------------------------|-------------------|---------------------|---------------------|--------------------|---------------------|---------------------------------------------------------------------|
| <b>Country of Origin (n%)</b> |                   |                     |                     |                    |                     | $\chi^2(100) = 255$<br>$p < 0.001$<br>$\varphi = 0.54$<br>$n = 221$ |
| Australia                     | 2 (2.4)           | 3 (3.2)             | 0 (0)               | 0 (0)              | 0 (0)               |                                                                     |
| Austria                       | 3 (3.5)           | 1 (1.1)             | 0 (0)               | 0 (0)              | 0 (0)               |                                                                     |
| Belgium                       | 5 (5.9)           | 2 (2.1)             | 1 (3.6)             | 0 (0)              | 0 (0)               |                                                                     |
| Canada                        | 2 (2.4)           | 1 (1.1)             | 1 (3.6)             | 2 (100)            | 0 (0)               |                                                                     |
| China                         | 2 (2.4)           | 3 (3.2)             | 2 (7.1)             | 0 (0)              | 0 (0)               |                                                                     |
| Denmark                       | 1 (1.2)           | 0 (0)               | 0 (0)               | 0 (0)              | 5 (45)              |                                                                     |
| England                       | 23 (27)           | 5 (5.3)             | 0 (0)               | 0 (0)              | 0 (0)               |                                                                     |
| Finland                       | 2 (2.4)           | 2 (2.1)             | 0 (0)               | 0 (0)              | 0 (0)               |                                                                     |
| France                        | 3 (3.5)           | 8 (8.4)             | 3 (11)              | 0 (0)              | 0 (0)               |                                                                     |
| Germany                       | 14 (16)           | 12 (13)             | 4 (14)              | 0 (0)              | 0 (0)               |                                                                     |
| India                         | 1 (1.2)           | 1 (1.1)             | 0 (0)               | 0 (0)              | 0 (0)               |                                                                     |
| Ireland                       | 0 (0)             | 1 (1.1)             | 0 (0)               | 0 (0)              | 0 (0)               |                                                                     |
| Israel                        | 11 (13)           | 0 (0)               | 3 (11)              | 0 (0)              | 4 (36)              |                                                                     |
| Italy                         | 0 (0)             | 1 (1.1)             | 0 (0)               | 0 (0)              | 0 (0)               |                                                                     |
| Japan                         | 0 (0)             | 1 (1.1)             | 1 (3.6)             | 0 (0)              | 0 (0)               |                                                                     |
| Lithuania                     | 0 (0)             | 1 (1.1)             | 0 (0)               | 0 (0)              | 0 (0)               |                                                                     |
| Netherlands                   | 1 (1.2)           | 7 (7.4)             | 1 (3.6)             | 0 (0)              | 0 (0)               |                                                                     |
| New Zealand                   | 1 (1.2)           | 0 (0)               | 0 (0)               | 0 (0)              | 0 (0)               |                                                                     |
| Poland                        | 0 (0)             | 2 (2.1)             | 0 (0)               | 0 (0)              | 0 (0)               |                                                                     |
| Singapore                     | 1 (1.2)           | 1 (1.1)             | 0 (0)               | 0 (0)              | 0 (0)               |                                                                     |
| South Korea                   | 1 (1.2)           | 3 (3.2)             | 2 (7.1)             | 0 (0)              | 1 (9.1)             |                                                                     |
| Spain                         | 1 (1.2)           | 1 (1.1)             | 0 (0)               | 0 (0)              | 0 (0)               |                                                                     |
| Sweden                        | 1 (1.2)           | 3 (3.2)             | 3 (11)              | 0 (0)              | 0 (0)               |                                                                     |
| Switzerland                   | 2 (2.4)           | 2 (2.1)             | 0 (0)               | 0 (0)              | 0 (0)               |                                                                     |
| Taiwan                        | 0 (0)             | 5 (5.3)             | 0 (0)               | 0 (0)              | 0 (0)               |                                                                     |
| United States                 | 8 (9.4)           | 29 (31)             | 7 (25)              | 0 (0)              | 1 (9.1)             |                                                                     |

|                                         |         |         |         |         |         |                    |
|-----------------------------------------|---------|---------|---------|---------|---------|--------------------|
| <b>Professional or Patient Use (n%)</b> |         |         |         |         |         | $\chi^2(8) = 12.6$ |
| Healthcare Professional                 | 60 (71) | 81 (85) | 25 (89) | 2 (100) | 10 (91) | $p = 0.13$         |
| Healthcare Professional and Patient     | 14 (16) | 6 (6.3) | 0 (0)   | 0 (0)   | 0 (0)   | $\varphi = 0.17$   |
| Patient                                 | 11 (13) | 8 (8.4) | 3 (11)  | 0 (0)   | 1 (9.1) | $n = 221$          |
| <b>Medical Specialty (n%)</b>           |         |         |         |         |         | $\chi^2(48) = 245$ |
| Anesthesiology                          | 1 (1.2) | 2 (2.1) | 0 (0)   | 0 (0)   | 0 (0)   | $p < 0.001$        |
| Cardiovascular                          | 4 (4.7) | 14 (15) | 5 (18)  | 0 (0)   | 0 (0)   | $\varphi = 0.53$   |
| Clinical Chemistry                      | 0 (0)   | 0 (0)   | 1 (3.6) | 0 (0)   | 2 (18)  | $n = 221$          |
| Dental                                  | 1 (1.2) | 0 (0)   | 0 (0)   | 0 (0)   | 0 (0)   |                    |
| Gastroenterology/Urology                | 3 (3.5) | 1 (1.1) | 1 (3.6) | 0 (0)   | 0 (0)   |                    |
| General Hospital                        | 21 (25) | 5 (5.3) | 3 (11)  | 0 (0)   | 0 (0)   |                    |
| Hematology                              | 0 (0)   | 0 (0)   | 0 (0)   | 0 (0)   | 1 (9.1) |                    |
| Microbiology                            | 1 (1.2) | 0 (0)   | 0 (0)   | 0 (0)   | 1 (9.1) |                    |
| Neurology                               | 15 (18) | 4 (4.2) | 0 (0)   | 0 (0)   | 0 (0)   |                    |
| Obstetrics/Gynecology                   | 1 (1.2) | 1 (1.1) | 0 (0)   | 0 (0)   | 0 (0)   |                    |
| Ophthalmic                              | 5 (5.9) | 6 (6.3) | 0 (0)   | 0 (0)   | 0 (0)   |                    |
| Pathology                               | 0 (0)   | 0 (0)   | 0 (0)   | 0 (0)   | 7 (64)  |                    |
| Radiology                               | 33 (39) | 62 (65) | 18 (64) | 2 (100) | 0 (0)   |                    |
| <b>Manufacturer Size (n%)</b>           |         |         |         |         |         | $\chi^2(4) = 27.2$ |
| Small                                   | 81 (95) | 68 (72) | 16 (57) | 2 (100) | 10 (91) | $p < 0.001$        |
| Large                                   | 4 (4.7) | 27 (28) | 12 (43) | 0 (0)   | 1 (9.1) | $\varphi = 0.35$   |
|                                         |         |         |         |         |         | $n = 221$          |

$\chi^2(N)$  = Pearson's chi-square coefficient, N = degrees of freedom. p = model significance (significant when  $p < 0.05$ ).  $\varphi$  = effect size (Cramer's V). n = total sample size.

Post-hoc analyses of significant chi-square statistics for CE marked devices

| <b>Characteristic</b>    | <b>Class I<br/>n = 85</b> | <b>Class IIa<br/>n = 95</b> | <b>Class IIb<br/>n = 28</b> | <b>Class III<br/>n = 2</b> | <b>Class IVD<br/>n = 11</b> |
|--------------------------|---------------------------|-----------------------------|-----------------------------|----------------------------|-----------------------------|
| <b>Country of Origin</b> |                           |                             |                             |                            |                             |
| Australia                |                           |                             |                             |                            |                             |
| <i>residuals</i>         | 0.07                      | 0.77                        | -0.86                       | -0.22                      | -0.52                       |
| <i>p-values</i>          | 1.00                      | 1.00                        | 1.00                        | 1.00                       | 1.00                        |
| Austria                  |                           |                             |                             |                            |                             |
| <i>residuals</i>         | 1.52                      | -0.73                       | -0.77                       | -0.19                      | -0.46                       |
| <i>p-values</i>          | 1.00                      | 1.00                        | 1.00                        | 1.00                       | 1.00                        |
| Belgium                  |                           |                             |                             |                            |                             |
| <i>residuals</i>         | 1.42                      | -1.05                       | -0.01                       | -0.28                      | -0.66                       |
| <i>p-values</i>          | 1.00                      | 1.00                        | 1.00                        | 1.00                       | 1.00                        |
| Canada                   |                           |                             |                             |                            |                             |
| <i>residuals</i>         | -0.26                     | -1.32                       | 0.30                        | 8.50                       | -0.57                       |
| <i>p-values</i>          | 1.00                      | 1.00                        | 1.00                        | <0.001                     | 1.00                        |
| China                    |                           |                             |                             |                            |                             |
| <i>residuals</i>         | -0.55                     | -0.01                       | 1.29                        | -0.26                      | -0.62                       |
| <i>p-values</i>          | 1.00                      | 1.00                        | 1.00                        | 1.00                       | 1.00                        |
| Denmark                  |                           |                             |                             |                            |                             |
| <i>residuals</i>         | -1.11                     | -2.16                       | -0.95                       | -0.24                      | 8.95                        |
| <i>p-values</i>          | 1.00                      | 1.00                        | 1.00                        | 1.00                       | <0.001                      |
| England                  |                           |                             |                             |                            |                             |
| <i>residuals</i>         | 5.08                      | -2.87                       | -2.20                       | -0.54                      | -1.30                       |
| <i>p-values</i>          | <0.001                    | 0.53                        | 1.00                        | 1.00                       | 1.00                        |
| Finland                  |                           |                             |                             |                            |                             |
| <i>residuals</i>         | 0.48                      | 0.29                        | -0.77                       | -0.19                      | -0.46                       |
| <i>p-values</i>          | 1.00                      | 1.00                        | 1.00                        | 1.00                       | 1.00                        |
| France                   |                           |                             |                             |                            |                             |
| <i>residuals</i>         | -1.35                     | 1.11                        | 1.02                        | -0.37                      | -0.88                       |
| <i>p-values</i>          | 1.00                      | 1.00                        | 1.00                        | 1.00                       | 1.00                        |
| Germany                  |                           |                             |                             |                            |                             |
| <i>residuals</i>         | 0.99                      | -0.36                       | 0.12                        | -0.56                      | -1.35                       |
| <i>p-values</i>          | 1.00                      | 1.00                        | 1.00                        | 1.00                       | 1.00                        |

|                  |       |       |       |       |       |
|------------------|-------|-------|-------|-------|-------|
| India            |       |       |       |       |       |
| <i>residuals</i> | 0.34  | 0.20  | -0.54 | -0.14 | -0.33 |
| <i>p-values</i>  | 1.00  | 1.00  | 1.00  | 1.00  | 1.00  |
| Ireland          |       |       |       |       |       |
| <i>residuals</i> | -0.79 | 1.15  | -0.38 | -0.10 | -0.23 |
| <i>p-values</i>  | 1.00  | 1.00  | 1.00  | 1.00  | 1.00  |
| Israel           |       |       |       |       |       |
| <i>residuals</i> | 2.06  | -3.84 | 0.53  | -0.42 | 3.51  |
| <i>p-values</i>  | 1.00  | 0.02  | 1.00  | 1.00  | 1.00  |
| Italy            |       |       |       |       |       |
| <i>residuals</i> | -0.79 | 1.15  | -0.38 | -0.10 | -0.23 |
| <i>p-values</i>  | 1.00  | 1.00  | 1.00  | 1.00  | 1.00  |
| Japan            |       |       |       |       |       |
| <i>residuals</i> | -1.12 | -0.20 | 1.59  | -0.14 | -0.33 |
| <i>p-values</i>  | 1.00  | 1.00  | 1.00  | 1.00  | 1.00  |
| Lithuania        |       |       |       |       |       |
| <i>residuals</i> | -0.79 | 1.15  | -0.38 | -0.10 | -0.23 |
| <i>p-values</i>  | 1.00  | 1.00  | 1.00  | 1.00  | 1.00  |
| Netherlands      |       |       |       |       |       |
| <i>residuals</i> | -1.72 | 2.15  | -0.14 | -0.29 | -0.70 |
| <i>p-values</i>  | 1.00  | 1.00  | 1.00  | 1.00  | 1.00  |
| New Zealand      |       |       |       |       |       |
| <i>residuals</i> | 1.27  | -0.87 | -0.38 | -0.10 | -0.23 |
| <i>p-values</i>  | 1.00  | 1.00  | 1.00  | 1.00  | 1.00  |
| Poland           |       |       |       |       |       |
| <i>residuals</i> | -1.12 | 1.64  | -0.54 | -0.14 | -0.33 |
| <i>p-values</i>  | 1.00  | 1.00  | 1.00  | 1.00  | 1.00  |
| Singapore        |       |       |       |       |       |
| <i>residuals</i> | 0.34  | 0.20  | -0.54 | -0.14 | -0.33 |
| <i>p-values</i>  | 1.00  | 1.00  | 1.00  | 1.00  | 1.00  |
| South Korea      |       |       |       |       |       |
| <i>residuals</i> | -1.34 | -0.01 | 1.29  | -0.26 | 1.15  |
| <i>p-values</i>  | 1.00  | 1.00  | 1.00  | 1.00  | 1.00  |
| Spain            |       |       |       |       |       |
| <i>residuals</i> | 0.34  | 0.20  | -0.54 | -0.14 | -0.33 |

|                            |        |       |       |       |        |
|----------------------------|--------|-------|-------|-------|--------|
| <i>p-values</i>            | 1.00   | 1.00  | 1.00  | 1.00  | 1.00   |
| Sweden                     |        |       |       |       |        |
| <i>residuals</i>           | -1.34  | -0.01 | 2.44  | -0.26 | -0.62  |
| <i>p-values</i>            | 1.00   | 1.00  | 1.00  | 1.00  | 1.00   |
| Switzerland                |        |       |       |       |        |
| <i>residuals</i>           | 0.48   | 0.29  | -0.77 | -0.19 | -0.46  |
| <i>p-values</i>            | 1.00   | 1.00  | 1.00  | 1.00  | 1.00   |
| Taiwan                     |        |       |       |       |        |
| <i>residuals</i>           | -1.79  | 2.60  | -0.86 | -0.22 | -0.52  |
| <i>p-values</i>            | 1.00   | 1.00  | 1.00  | 1.00  | 1.00   |
| United States              |        |       |       |       |        |
| <i>residuals</i>           | -3.20  | 3.26  | 0.65  | -0.72 | -0.95  |
| <i>p-values</i>            | 0.18   | 0.15  | 1.00  | 1.00  | 1.00   |
| <b>Medical Specialty</b>   |        |       |       |       |        |
| Anesthesiology             |        |       |       |       |        |
| <i>residuals</i>           | -0.18  | 0.83  | -0.66 | -0.17 | -0.40  |
| <i>p-values</i>            | 1.00   | 1.00  | 1.00  | 1.00  | 1.00   |
| Cardiovascular             |        |       |       |       |        |
| <i>residuals</i>           | -2.19  | 1.83  | 1.38  | -0.48 | -1.16  |
| <i>p-values</i>            | 1.00   | 1.00  | 1.00  | 1.00  | 1.00   |
| Clinical Chemistry         |        |       |       |       |        |
| <i>residuals</i>           | -1.38  | -1.51 | 1.08  | -0.17 | 4.95   |
| <i>p-values</i>            | 1.00   | 1.00  | 1.00  | 1.00  | <0.001 |
| Dental                     |        |       |       |       |        |
| <i>residuals</i>           | 1.27   | -0.87 | -0.38 | -0.10 | -0.23  |
| <i>p-values</i>            | 1.00   | 1.00  | 1.00  | 1.00  | 1.00   |
| Gastroenterology / Urology |        |       |       |       |        |
| <i>residuals</i>           | 1.00   | -1.05 | 0.50  | -0.22 | -0.52  |
| <i>p-values</i>            | 1.00   | 1.00  | 1.00  | 1.00  | 1.00   |
| General Hospital           |        |       |       |       |        |
| <i>residuals</i>           | 4.03   | -3.00 | -0.40 | -0.55 | -1.32  |
| <i>p-values</i>            | <0.001 | 0.17  | 1.00  | 1.00  | 1.00   |
| Hematology                 |        |       |       |       |        |
| <i>residuals</i>           | -0.79  | -0.87 | -0.38 | -0.10 | 4.38   |

|                          |        |       |       |       |        |
|--------------------------|--------|-------|-------|-------|--------|
| <i>p-values</i>          | 1.00   | 1.00  | 1.00  | 1.00  | <0.001 |
| Microbiology             |        |       |       |       |        |
| <i>residuals</i>         | 0.34   | -1.23 | -0.54 | -0.14 | 2.94   |
| <i>p-values</i>          | 1.00   | 1.00  | 1.00  | 1.00  | 0.22   |
| Neurology                |        |       |       |       |        |
| <i>residuals</i>         | 3.80   | -2.02 | -1.74 | -0.44 | -1.04  |
| <i>p-values</i>          | 0.01   | 1.00  | 1.00  | 1.00  | 1.00   |
| Obstetrics / Gynecology  |        |       |       |       |        |
| <i>residuals</i>         | 0.34   | 0.20  | -0.54 | -0.14 | -0.33  |
| <i>p-values</i>          | 1.00   | 1.00  | 1.00  | 1.00  | 1.00   |
| Ophthalmic               |        |       |       |       |        |
| <i>residuals</i>         | 0.49   | 0.79  | -1.30 | -0.33 | -0.78  |
| <i>p-values</i>          | 1.00   | 1.00  | 1.00  | 1.00  | 1.00   |
| Pathology                |        |       |       |       |        |
| <i>residuals</i>         | -2.13  | -2.33 | -1.02 | -0.26 | 11.7   |
| <i>p-values</i>          | 1.00   | 1.00  | 1.00  | 1.00  | <0.001 |
| Radiology                |        |       |       |       |        |
| <i>residuals</i>         | -3.11  | 3.42  | 1.39  | 1.37  | -3.54  |
| <i>p-values</i>          | 0.12   | 0.04  | 1.00  | 1.00  | 0.03   |
| <b>Manufacturer Size</b> |        |       |       |       |        |
| Small                    |        |       |       |       |        |
| <i>residuals</i>         | -4.47  | 2.75  | 3.25  | -0.71 | -0.92  |
| <i>p-values</i>          | <0.001 | 0.06  | 0.01  | 1.00  | 1.00   |
| Large                    |        |       |       |       |        |
| <i>residuals</i>         | 4.47   | -2.75 | -3.25 | 0.71  | 0.92   |
| <i>p-values</i>          | <0.001 | 0.06  | 0.01  | 1.00  | 1.00   |

---

p = model significance (significant when p < 0.05).



Multivariate regression results of commonly approved products by the FDA and CE marked in Europe

| Predictor                          | <i>b</i>   | <i>b</i><br>95% CI<br>[LL, UL] | <i>sr</i> <sup>2</sup> | <i>sr</i> <sup>2</sup><br>95% CI<br>[LL, UL] | Fit |
|------------------------------------|------------|--------------------------------|------------------------|----------------------------------------------|-----|
| (Intercept)                        | 996.28*    | [38.26, 1954.30]               |                        |                                              |     |
| <b>CE Mark Certification Year</b>  |            |                                |                        |                                              |     |
| 2016                               | -294.83    | [-625.99, 36.33]               | .01                    | [-.01, .04]                                  |     |
| 2017                               | -431.70*   | [-766.97, -96.44]              | .03                    | [-.01, .06]                                  |     |
| 2018                               | -780.07**  | [-1106.09, -454.04]            | .10                    | [.03, .17]                                   |     |
| 2019                               | -1039.31** | [-1349.32, -729.31]            | .19                    | [.10, .29]                                   |     |
| 2020                               | -893.71**  | [-1340.10, -447.31]            | .07                    | [.01, .13]                                   |     |
| <b>Country of Origin</b>           |            |                                |                        |                                              |     |
| Austria                            | 578.95     | [-4.93, 1162.82]               | .02                    | [-.01, .04]                                  |     |
| Belgium                            | 219.22     | [-326.35, 764.78]              | .00                    | [-.01, .01]                                  |     |
| Canada                             | 324.84     | [-259.73, 909.40]              | .01                    | [-.01, .02]                                  |     |
| China                              | 404.10     | [-159.49, 967.70]              | .01                    | [-.01, .03]                                  |     |
| England                            | 96.55      | [-429.77, 622.87]              | .00                    | [-.00, .01]                                  |     |
| Finland                            | 266.26     | [-378.96, 911.49]              | .00                    | [-.01, .01]                                  |     |
| France                             | 343.01     | [-201.25, 887.27]              | .01                    | [-.01, .02]                                  |     |
| Germany                            | 268.40     | [-229.68, 766.48]              | .01                    | [-.01, .02]                                  |     |
| Ireland                            | 82.63      | [-889.09, 1054.34]             | .00                    | [-.00, .00]                                  |     |
| Israel                             | 342.88     | [-158.05, 843.80]              | .01                    | [-.01, .03]                                  |     |
| Italy                              | 402.11     | [-459.43, 1263.64]             | .00                    | [-.01, .02]                                  |     |
| Japan                              | 295.82     | [-335.17, 926.82]              | .00                    | [-.01, .02]                                  |     |
| Netherlands                        | 167.06     | [-386.24, 720.37]              | .00                    | [-.01, .01]                                  |     |
| New Zealand                        | -6.54      | [-798.41, 785.33]              | .00                    | [-.00, .00]                                  |     |
| South Korea                        | 6.69       | [-582.28, 595.67]              | .00                    | [-.00, .00]                                  |     |
| Sweden                             | 155.21     | [-368.35, 678.78]              | .00                    | [-.01, .01]                                  |     |
| Switzerland                        | 156.87     | [-600.69, 914.42]              | .00                    | [-.00, .01]                                  |     |
| Taiwan                             | 11.95      | [-557.69, 581.59]              | .00                    | [-.00, .00]                                  |     |
| United States                      | 46.02      | [-428.40, 520.43]              | .00                    | [-.00, .00]                                  |     |
| <b>Professional or Patient Use</b> |            |                                |                        |                                              |     |
| Physician                          | -25.26     | [-343.31, 292.79]              | .00                    | [-.00, .00]                                  |     |
| <b>Medical Specialty</b>           |            |                                |                        |                                              |     |

|                           |           |                     |     |             |
|---------------------------|-----------|---------------------|-----|-------------|
| Cardiovascular            | -573.08   | [-1213.13, 66.98]   | .01 | [-.01, .04] |
| Clinical Chemistry        | -906.90*  | [-1634.05, -179.75] | .03 | [-.01, .06] |
| Dental                    | -465.40   | [-1404.39, 473.59]  | .00 | [-.01, .02] |
| Gastroenterology/Urology  | -370.31   | [-1124.72, 384.11]  | .00 | [-.01, .02] |
| General Hospital          | -925.90** | [-1615.91, -235.88] | .03 | [-.01, .07] |
| Hematology                | -250.90   | [-1127.22, 625.42]  | .00 | [-.01, .01] |
| Microbiology              | -236.40   | [-1068.81, 596.01]  | .00 | [-.01, .01] |
| Neurology                 | -686.63*  | [-1276.04, -97.23]  | .02 | [-.01, .06] |
| Obstetrics/Gynecology     | -529.38   | [-1625.85, 567.08]  | .00 | [-.01, .02] |
| Ophthalmic                | -88.91    | [-997.22, 819.39]   | .00 | [-.00, .00] |
| Radiology                 | -442.84   | [-1069.32, 183.63]  | .01 | [-.01, .03] |
| <b>Manufacturer Size</b>  |           |                     |     |             |
| Small                     | 26.88     | [-161.12, 214.88]   | .00 | [-.00, .00] |
| <b>Regulatory Pathway</b> |           |                     |     |             |
| 510(k)                    | 166.20    | [-305.18, 637.57]   | .00 | [-.01, .01] |
| de novo                   | 356.06    | [-300.59, 1012.71]  | .01 | [-.01, .02] |

$$R^2 = .660^{**}$$

*Note.* A significant *b*-weight indicates the semi-partial correlation is also significant. *b* represents unstandardized regression weights. *sr*<sup>2</sup> represents the semi-partial correlation squared. *LL* and *UL* indicate the lower and upper limits of a confidence interval, respectively.

\* indicates  $p < .05$ . \*\* indicates  $p < .01$ .

*Sensitivity analysis with excluded outliers for commonly approved devices by the FDA and CE marked in Europe*

| Predictor                          | <i>b</i>  | <i>b</i><br>95% CI<br>[LL, UL] | <i>sr</i> <sup>2</sup> | <i>sr</i> <sup>2</sup><br>95% CI<br>[LL, UL] | Fit |
|------------------------------------|-----------|--------------------------------|------------------------|----------------------------------------------|-----|
| (Intercept)                        | 772.69    | [-117.01, 1662.39]             |                        |                                              |     |
| <b>CE Mark Certification Year</b>  |           |                                |                        |                                              |     |
| 2016                               | -210.32   | [-518.37, 97.72]               | .01                    | [-.01, .03]                                  |     |
| 2017                               | -329.66*  | [-642.83, -16.48]              | .02                    | [-.01, .05]                                  |     |
| 2018                               | -680.72** | [-985.27, -376.17]             | .08                    | [.02, .14]                                   |     |
| 2019                               | -904.19** | [-1198.00, -610.39]            | .15                    | [.07, .24]                                   |     |
| 2020                               | -845.53** | [-1257.36, -433.70]            | .07                    | [.01, .12]                                   |     |
| <b>Country of Origin</b>           |           |                                |                        |                                              |     |
| Austria                            | 499.33    | [-39.92, 1038.58]              | .01                    | [-.01, .04]                                  |     |
| Belgium                            | 185.22    | [-317.51, 687.94]              | .00                    | [-.01, .01]                                  |     |
| Canada                             | 334.24    | [-204.11, 872.59]              | .01                    | [-.01, .02]                                  |     |
| China                              | 385.49    | [-133.62, 904.59]              | .01                    | [-.01, .03]                                  |     |
| England                            | 94.03     | [-390.66, 578.72]              | .00                    | [-.00, .01]                                  |     |
| Finland                            | 280.57    | [-313.67, 874.81]              | .00                    | [-.01, .02]                                  |     |
| France                             | 342.90    | [-158.32, 844.11]              | .01                    | [-.01, .03]                                  |     |
| Germany                            | 319.66    | [-139.79, 779.10]              | .01                    | [-.01, .03]                                  |     |
| Ireland                            | 276.46    | [-623.92, 1176.85]             | .00                    | [-.01, .01]                                  |     |
| Israel                             | 321.13    | [-140.31, 782.57]              | .01                    | [-.01, .03]                                  |     |
| Italy                              | 249.65    | [-547.61, 1046.90]             | .00                    | [-.01, .01]                                  |     |
| Japan                              | 333.78    | [-247.64, 915.19]              | .01                    | [-.01, .02]                                  |     |
| Netherlands                        | 191.30    | [-318.39, 701.00]              | .00                    | [-.01, .01]                                  |     |
| New Zealand                        | -15.54    | [-744.80, 713.71]              | .00                    | [-.00, .00]                                  |     |
| South Korea                        | -14.66    | [-557.17, 527.84]              | .00                    | [-.00, .00]                                  |     |
| Sweden                             | 340.34    | [-151.12, 831.79]              | .01                    | [-.01, .03]                                  |     |
| Switzerland                        | 16.00     | [-685.39, 717.39]              | .00                    | [-.00, .00]                                  |     |
| Taiwan                             | 13.07     | [-511.52, 537.66]              | .00                    | [-.00, .00]                                  |     |
| United States                      | 26.25     | [-410.76, 463.26]              | .00                    | [-.00, .00]                                  |     |
| <b>Professional or Patient Use</b> |           |                                |                        |                                              |     |
| Physician                          | 125.12    | [-177.80, 428.05]              | .00                    | [-.01, .01]                                  |     |
| <b>Medical Specialty</b>           |           |                                |                        |                                              |     |

|                           |           |                     |     |             |
|---------------------------|-----------|---------------------|-----|-------------|
| Cardiovascular            | -627.83*  | [-1217.93, -37.73]  | .02 | [-.01, .05] |
| Clinical Chemistry        | -879.70*  | [-1549.49, -209.92] | .03 | [-.01, .06] |
| Dental                    | -443.47   | [-1308.27, 421.32]  | .00 | [-.01, .02] |
| Gastroenterology/Urology  | -433.99   | [-1129.51, 261.53]  | .01 | [-.01, .02] |
| General Hospital          | -892.76** | [-1528.43, -257.09] | .03 | [-.00, .07] |
| Hematology                | -303.97   | [-1111.45, 503.50]  | .00 | [-.01, .01] |
| Microbiology              | -217.72   | [-984.36, 548.91]   | .00 | [-.01, .01] |
| Neurology                 | -443.77   | [-1000.72, 113.19]  | .01 | [-.01, .03] |
| Obstetrics/Gynecology     | -438.13   | [-1448.97, 572.70]  | .00 | [-.01, .01] |
| Ophthalmic                | -117.60   | [-954.20, 719.00]   | .00 | [-.00, .00] |
| Radiology                 | -511.37   | [-1089.37, 66.63]   | .01 | [-.01, .04] |
| <b>Manufacturer Size</b>  |           |                     |     |             |
| Small                     | 89.02     | [-87.03, 265.07]    | .00 | [-.01, .02] |
| <b>Regulatory Pathway</b> |           |                     |     |             |
| 510(k)                    | 152.73    | [-281.42, 586.88]   | .00 | [-.01, .01] |
| de novo                   | 465.08    | [-142.23, 1072.38]  | .01 | [-.01, .03] |

$$R^2 = .687^{**}$$

*Note.* A significant *b*-weight indicates the semi-partial correlation is also significant. *b* represents unstandardized regression weights. *sr*<sup>2</sup> represents the semi-partial correlation squared. *LL* and *UL* indicate the lower and upper limits of a confidence interval, respectively.

\* indicates  $p < .05$ . \*\* indicates  $p < .01$ .

*Sensitivity analysis with continuous CE marking year variables for commonly approved devices by the FDA and CE marked in Europe*

| Predictor                          | <i>b</i>    | <i>b</i><br>95% CI<br>[LL, UL] | <i>sr</i> <sup>2</sup> | <i>sr</i> <sup>2</sup><br>95% CI<br>[LL, UL] | Fit |
|------------------------------------|-------------|--------------------------------|------------------------|----------------------------------------------|-----|
| (Intercept)                        | 473685.64** | [365298.85, 582072.43]         |                        |                                              |     |
| <b>CE Mark Certification Year</b>  | -234.69**   | [-288.35, -181.03]             | .34                    | [.22, .46]                                   |     |
| <b>Country of Origin</b>           |             |                                |                        |                                              |     |
| Austria                            | 566.13      | [-14.04, 1146.29]              | .02                    | [-.01, .05]                                  |     |
| Belgium                            | 250.58      | [-288.64, 789.80]              | .00                    | [-.01, .02]                                  |     |
| Canada                             | 379.02      | [-198.11, 956.15]              | .01                    | [-.01, .03]                                  |     |
| China                              | 383.95      | [-184.30, 952.19]              | .01                    | [-.01, .03]                                  |     |
| England                            | 164.15      | [-352.56, 680.86]              | .00                    | [-.01, .01]                                  |     |
| Finland                            | 300.48      | [-332.89, 933.85]              | .00                    | [-.01, .02]                                  |     |
| France                             | 383.73      | [-160.45, 927.90]              | .01                    | [-.01, .03]                                  |     |
| Germany                            | 352.01      | [-140.62, 844.65]              | .01                    | [-.01, .03]                                  |     |
| Ireland                            | 141.66      | [-823.82, 1107.15]             | .00                    | [-.00, .00]                                  |     |
| Israel                             | 384.45      | [-114.72, 883.61]              | .01                    | [-.01, .03]                                  |     |
| Italy                              | 428.61      | [-411.81, 1269.03]             | .00                    | [-.01, .02]                                  |     |
| Japan                              | 344.00      | [-290.78, 978.78]              | .01                    | [-.01, .02]                                  |     |
| Netherlands                        | 231.85      | [-310.83, 774.53]              | .00                    | [-.01, .02]                                  |     |
| New Zealand                        | 123.80      | [-653.38, 900.97]              | .00                    | [-.00, .01]                                  |     |
| South Korea                        | 13.41       | [-567.93, 594.74]              | .00                    | [-.00, .00]                                  |     |
| Sweden                             | 235.94      | [-275.03, 746.92]              | .00                    | [-.01, .02]                                  |     |
| Switzerland                        | 171.13      | [-560.21, 902.46]              | .00                    | [-.01, .01]                                  |     |
| Taiwan                             | 36.55       | [-525.07, 598.16]              | .00                    | [-.00, .00]                                  |     |
| United States                      | 104.13      | [-366.49, 574.75]              | .00                    | [-.01, .01]                                  |     |
| <b>Professional or Patient Use</b> |             |                                |                        |                                              |     |
| Physician                          | -31.41      | [-346.18, 283.37]              | .00                    | [-.00, .00]                                  |     |
| <b>Medical Specialty</b>           |             |                                |                        |                                              |     |
| Cardiovascular                     | -474.98     | [-1083.86, 133.90]             | .01                    | [-.01, .03]                                  |     |
| Clinical Chemistry                 | -832.86*    | [-1537.05, -128.68]            | .02                    | [-.01, .06]                                  |     |
| Dental                             | -401.68     | [-1327.19, 523.82]             | .00                    | [-.01, .02]                                  |     |
| Gastroenterology/Urology           | -370.97     | [-1132.40, 390.45]             | .00                    | [-.01, .02]                                  |     |
| General Hospital                   | -893.25*    | [-1572.98, -213.53]            | .03                    | [-.01, .07]                                  |     |

|                           |          |                    |     |             |
|---------------------------|----------|--------------------|-----|-------------|
| Hematology                | -230.28  | [-1115.66, 655.10] | .00 | [-.01, .01] |
| Microbiology              | -200.78  | [-1039.08, 637.52] | .00 | [-.01, .01] |
| Neurology                 | -641.24* | [-1211.98, -70.50] | .02 | [-.01, .06] |
| Obstetrics/Gynecology     | -293.92  | [-1366.21, 778.37] | .00 | [-.01, .01] |
| Ophthalmic                | -65.60   | [-968.37, 837.16]  | .00 | [-.00, .00] |
| Radiology                 | -397.32  | [-1011.08, 216.43] | .01 | [-.01, .03] |
| <b>Manufacturer Size</b>  |          |                    |     |             |
| Small                     | 70.67    | [-108.37, 249.70]  | .00 | [-.01, .01] |
| <b>Regulatory Pathway</b> |          |                    |     |             |
| 510(k)                    | 207.64   | [-251.38, 666.66]  | .00 | [-.01, .02] |
| de novo                   | 317.50   | [-329.90, 964.90]  | .00 | [-.01, .02] |

$R^2 = .634^{**}$

*Note.* A significant *b*-weight indicates the semi-partial correlation is also significant. *b* represents unstandardized regression weights.  $sr^2$  represents the semi-partial correlation squared. *LL* and *UL* indicate the lower and upper limits of a confidence interval, respectively.

\* indicates  $p < .05$ . \*\* indicates  $p < .01$ .
